# Supplementary material
Source: Research Square preprint supplement (doi:10.21203/rs.3.rs-8905265/v1)
Supplement: Supplementary file 1 [file 8af9dbe04106fd88182a80ca.docx]

**Host-Derived Lactic Acid Disrupts IFN Clinical Efficacy via Antiviral Inhibition and Proinflammatory Amplification**

**Supplementary Materials**

**This PDF file includes:**

**Figs. S1 to S11**

**Tables S1 to S2**

**
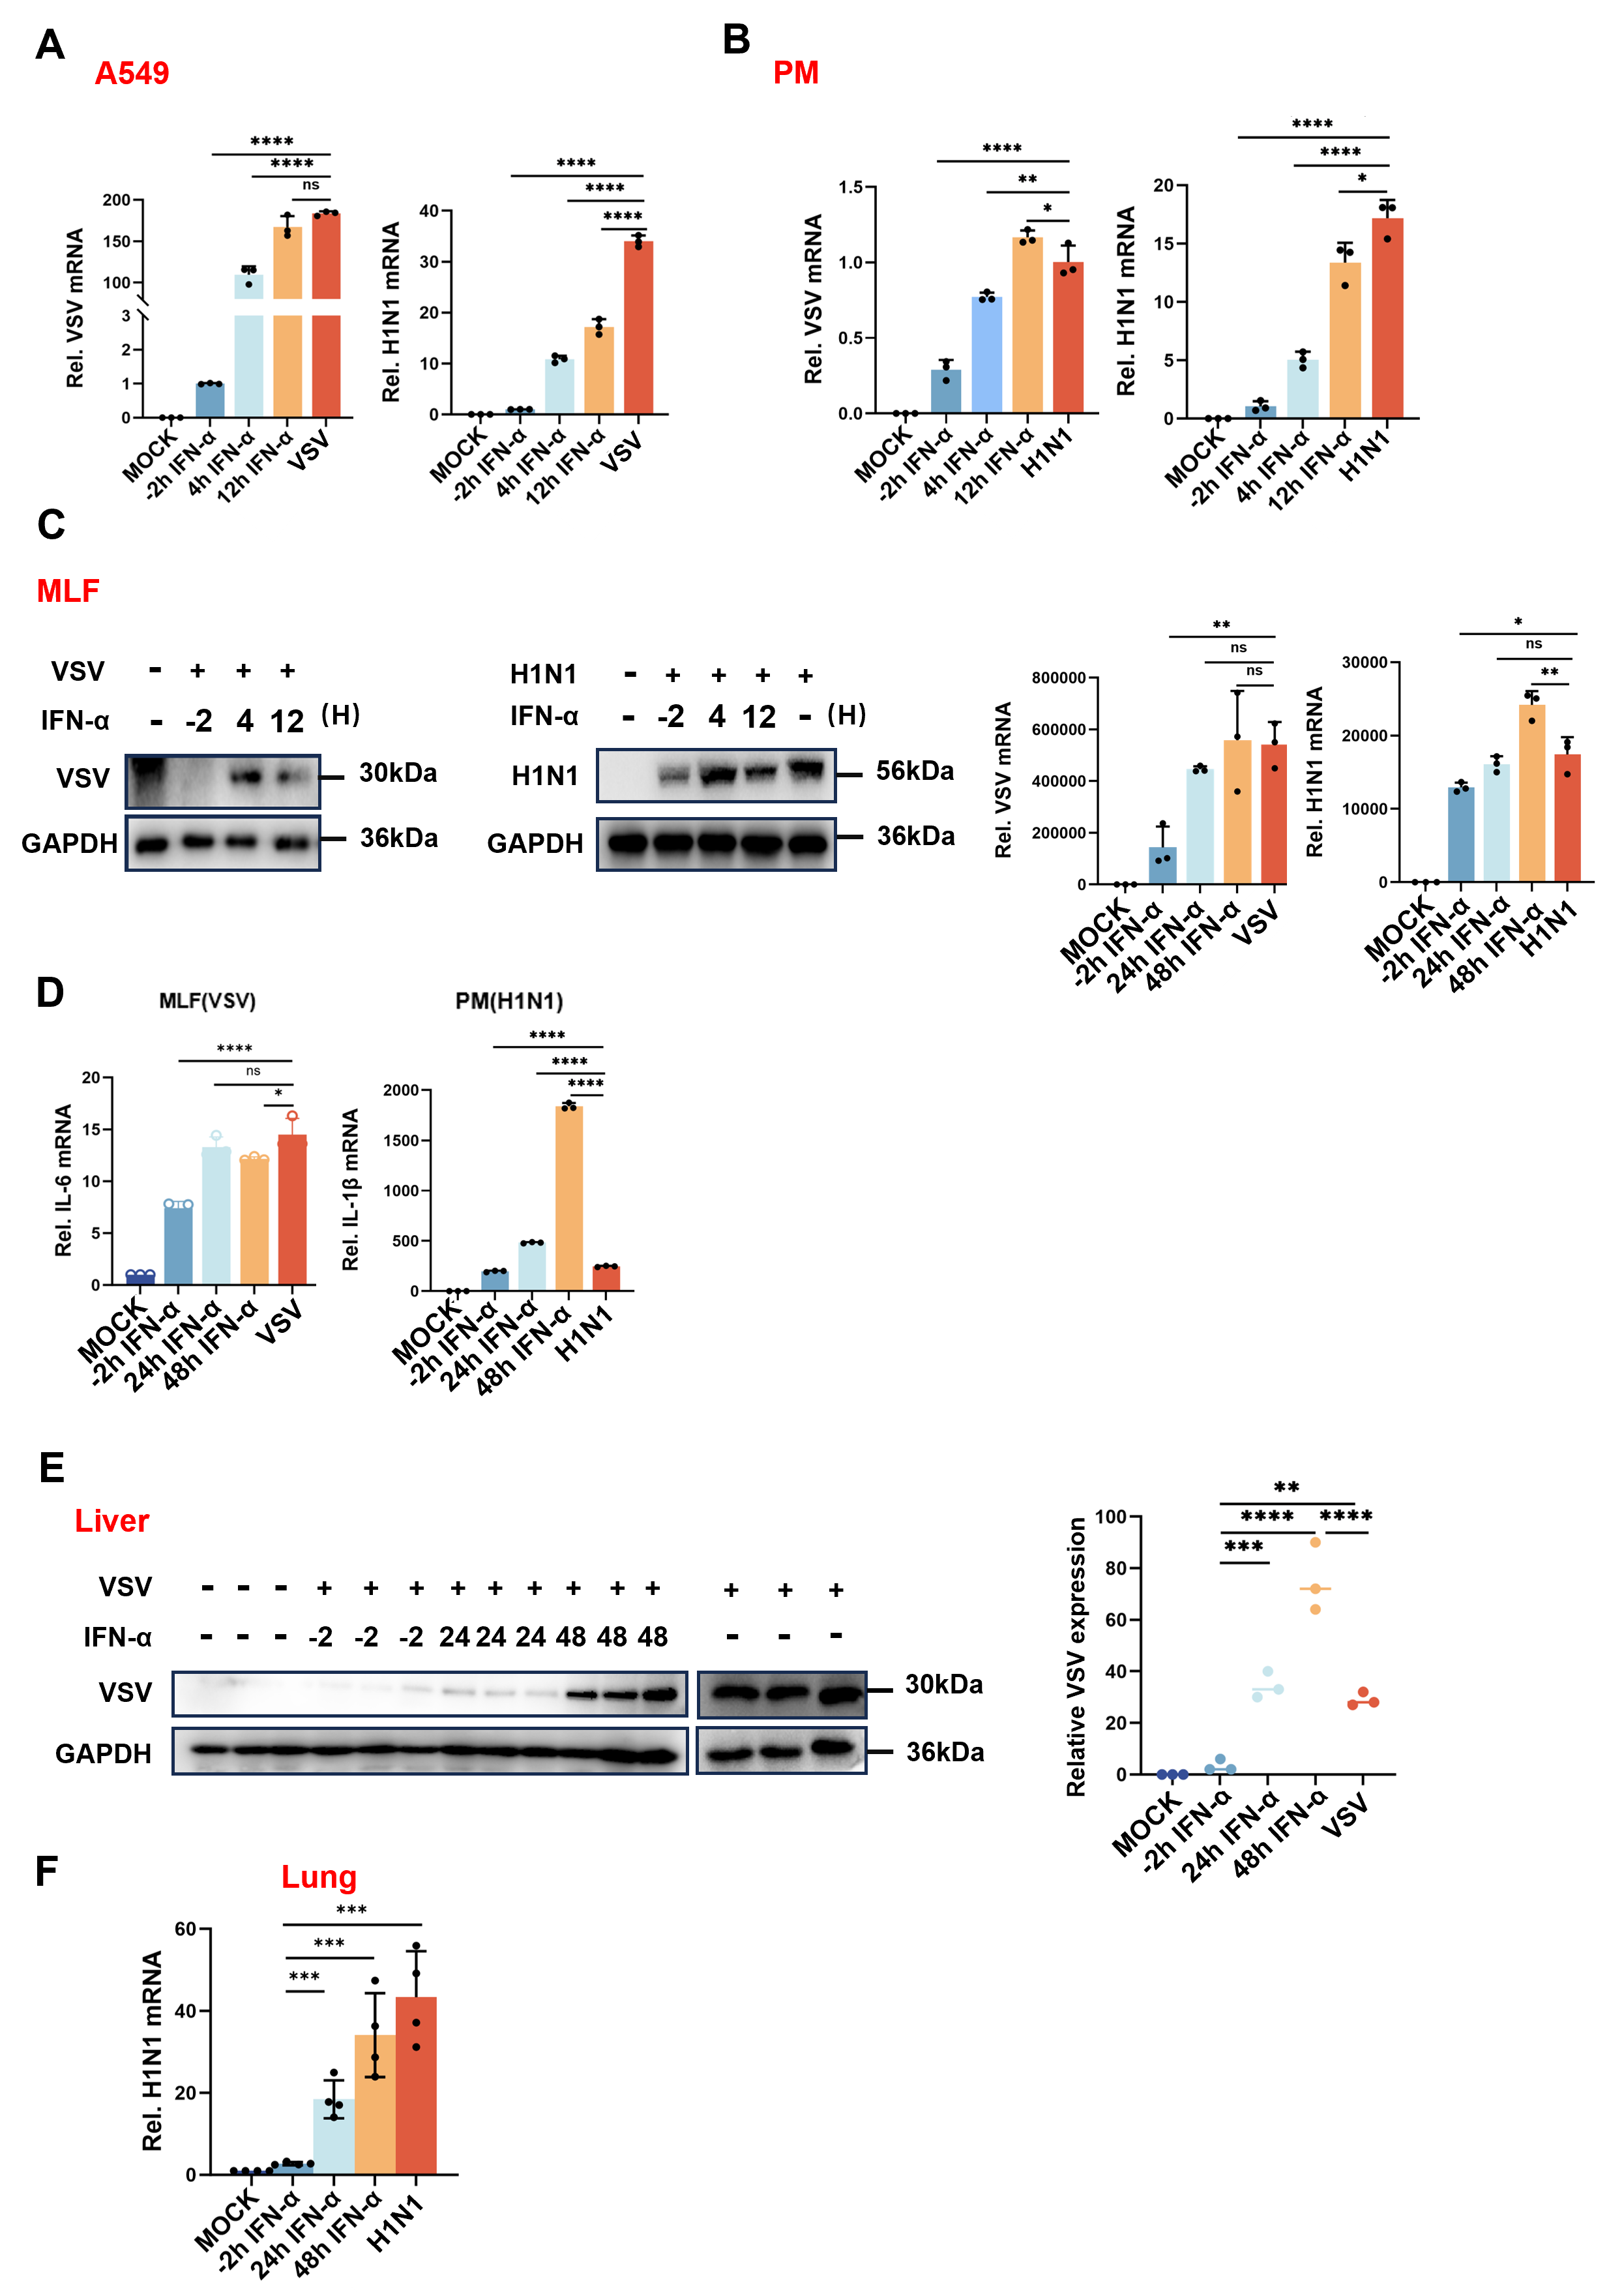
Figure S1 IFN-α Fails to Protect Against Established Viral Infection and Promotes Inflammation**

(A and B) qPCR analysis of the effect of IFN-α (2 nM) administration at different time points (-2 h, +4 h, +12 h) on viral (VSV, H1N1) replication in A549 and PMs.​

(C) Western blot and qPCR analyses of the effect of IFN-α (2 nM) administration at different time points (-2 h, +4 h, +12 h) on viral (VSV, H1N1) replication in MLFs.​

(D) qPCR analysis of the effect of IFN-α (2 nM) administration at different time points (-2 h, +4 h, +12 h) on virus (VSV, H1N1) induced proinflammatory cytokine expression in PMs and MLFs.​

(E) Western blot analysis and densitometric quantification of the effect of IFN-α (200 ng per mouse) administration at different time points (-2 h, +24 h, +48 h) on viral (VSV) replication in mice. Data are presented as mean ± SD; n = 3. ∗∗p < 0.01.

(F) qPCR of the effect of IFN-α (200 ng per mouse) administration at different time points (-2 h, +24 h, +48 h) on viral (H1N1) replication in mice. Data are presented as mean ± SD; n = 3. ∗∗∗p < 0.001.

**
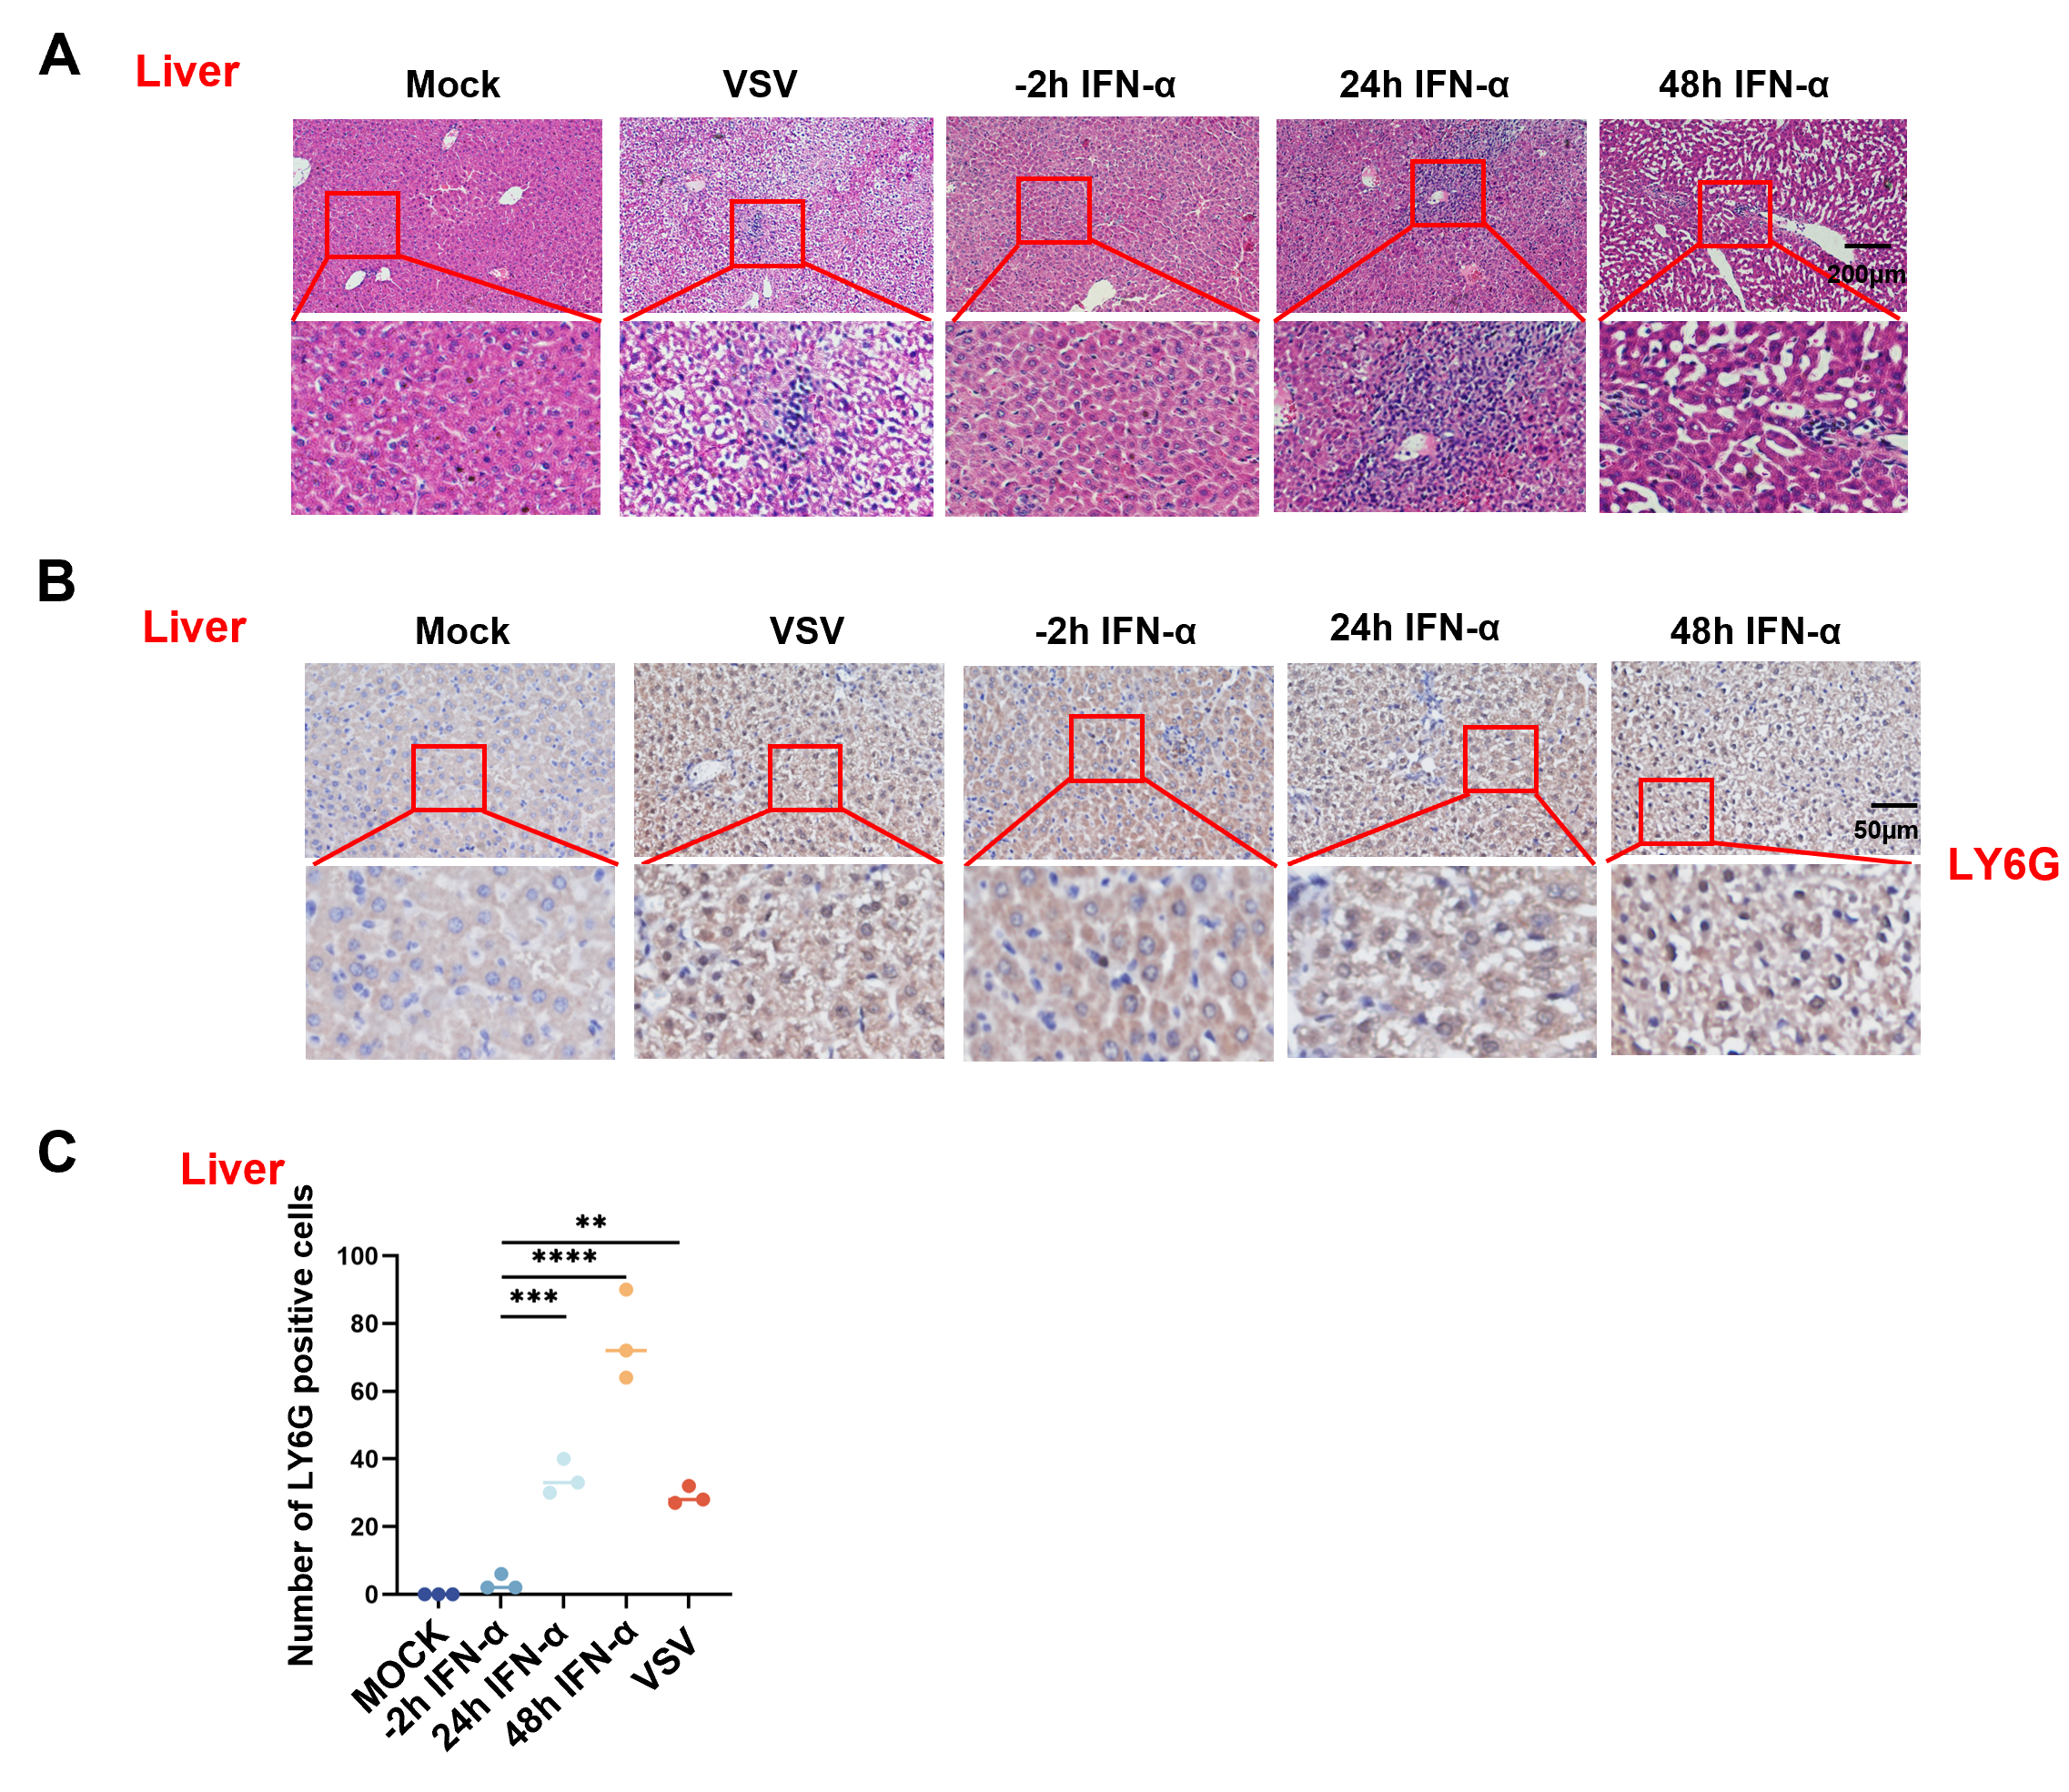
Figure S2 IFN-α Fails to Protect Against Established Viral Infection and Promotes Inflammation ​**

(A) H&E staining of lung damage induced by viral (VSV) infection in mice following IFN-α (200 ng per mouse) administration at different time points (-2 h, +24 h, +48 h).​

(B and C) IHC (LY6G) staining of lung damage induced by viral (VSV) infection in mice following IFN-α (200 ng per mouse) administration at different time points (-2 h, +24 h, +48 h). Quantification of LY6G-positive cells. Data are presented as mean ± SD; n = 3. ∗∗p < 0.01, ∗∗∗p < 0.001, ∗∗∗∗p < 0.01.

**
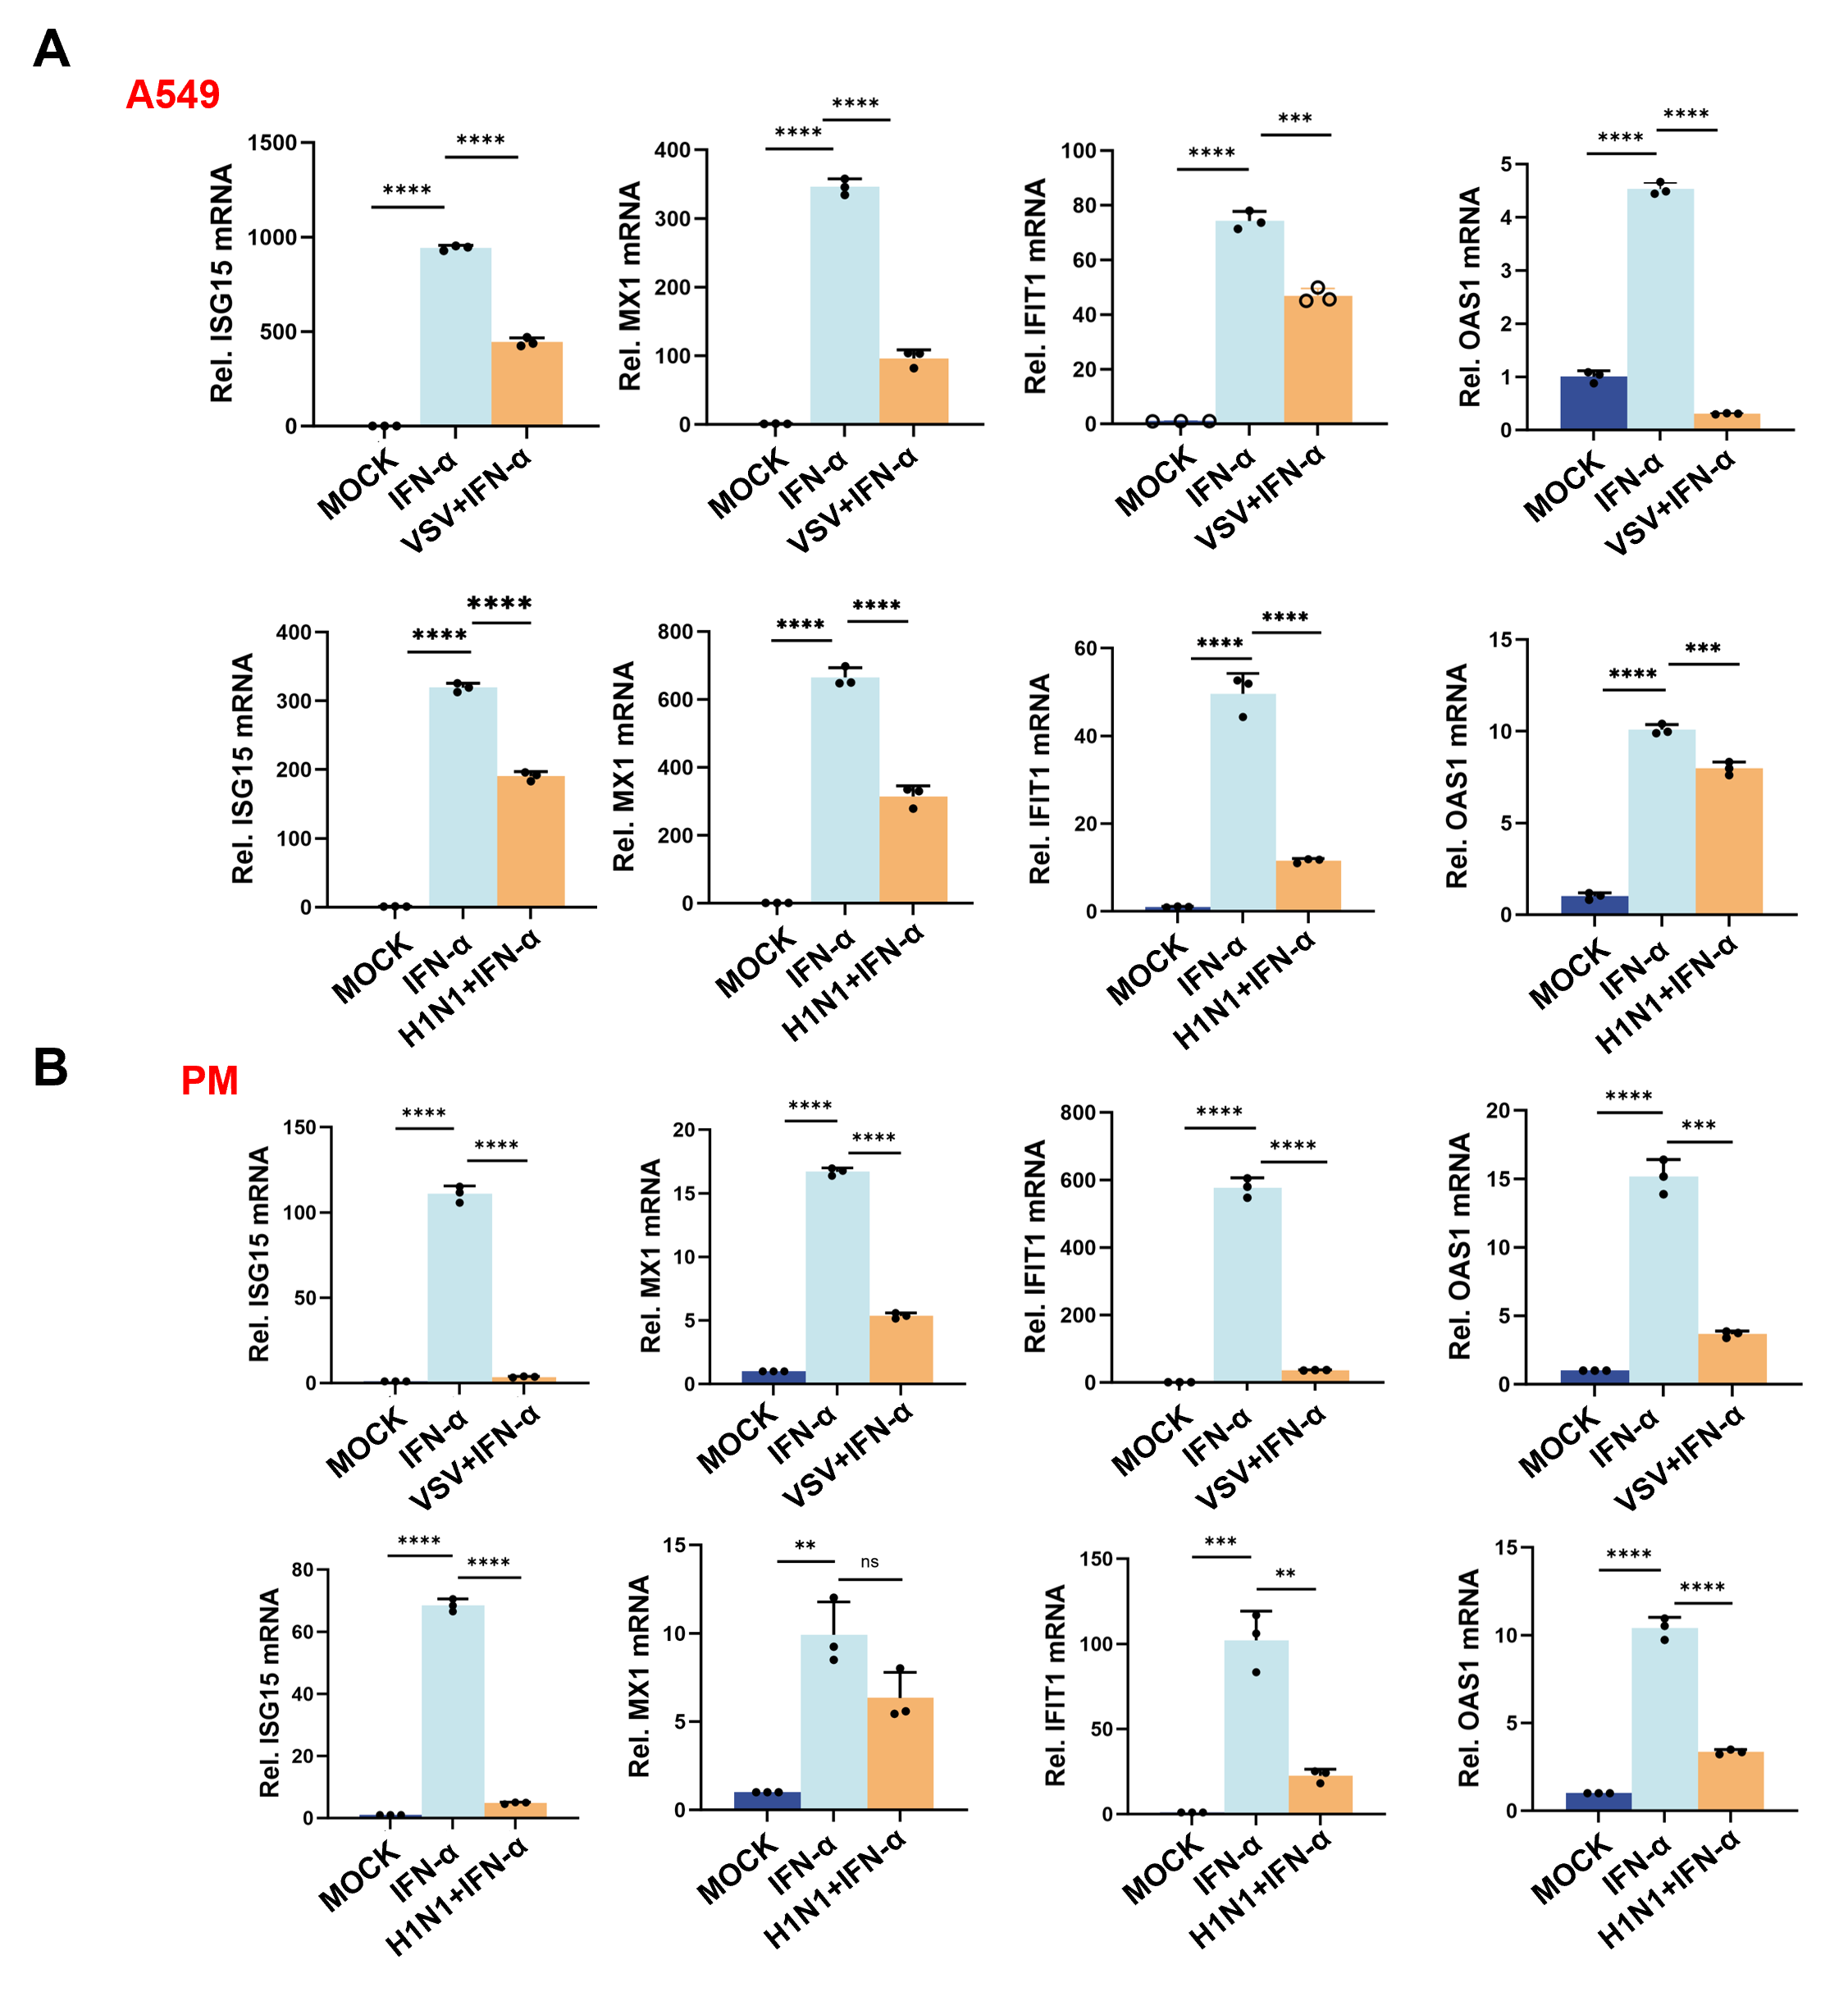
Figure S3 Established Viral Infection Suppresses IFN-α Signaling Transduction​**

(A) qPCR analysis of the expression of *p-STAT1* and *ISG15* in IFN-α-treated A549 cells with viral infection.​

(B) qPCR analysis of *p-STAT1* expression in IFN-α-treated PMs with or without viral infection.

**
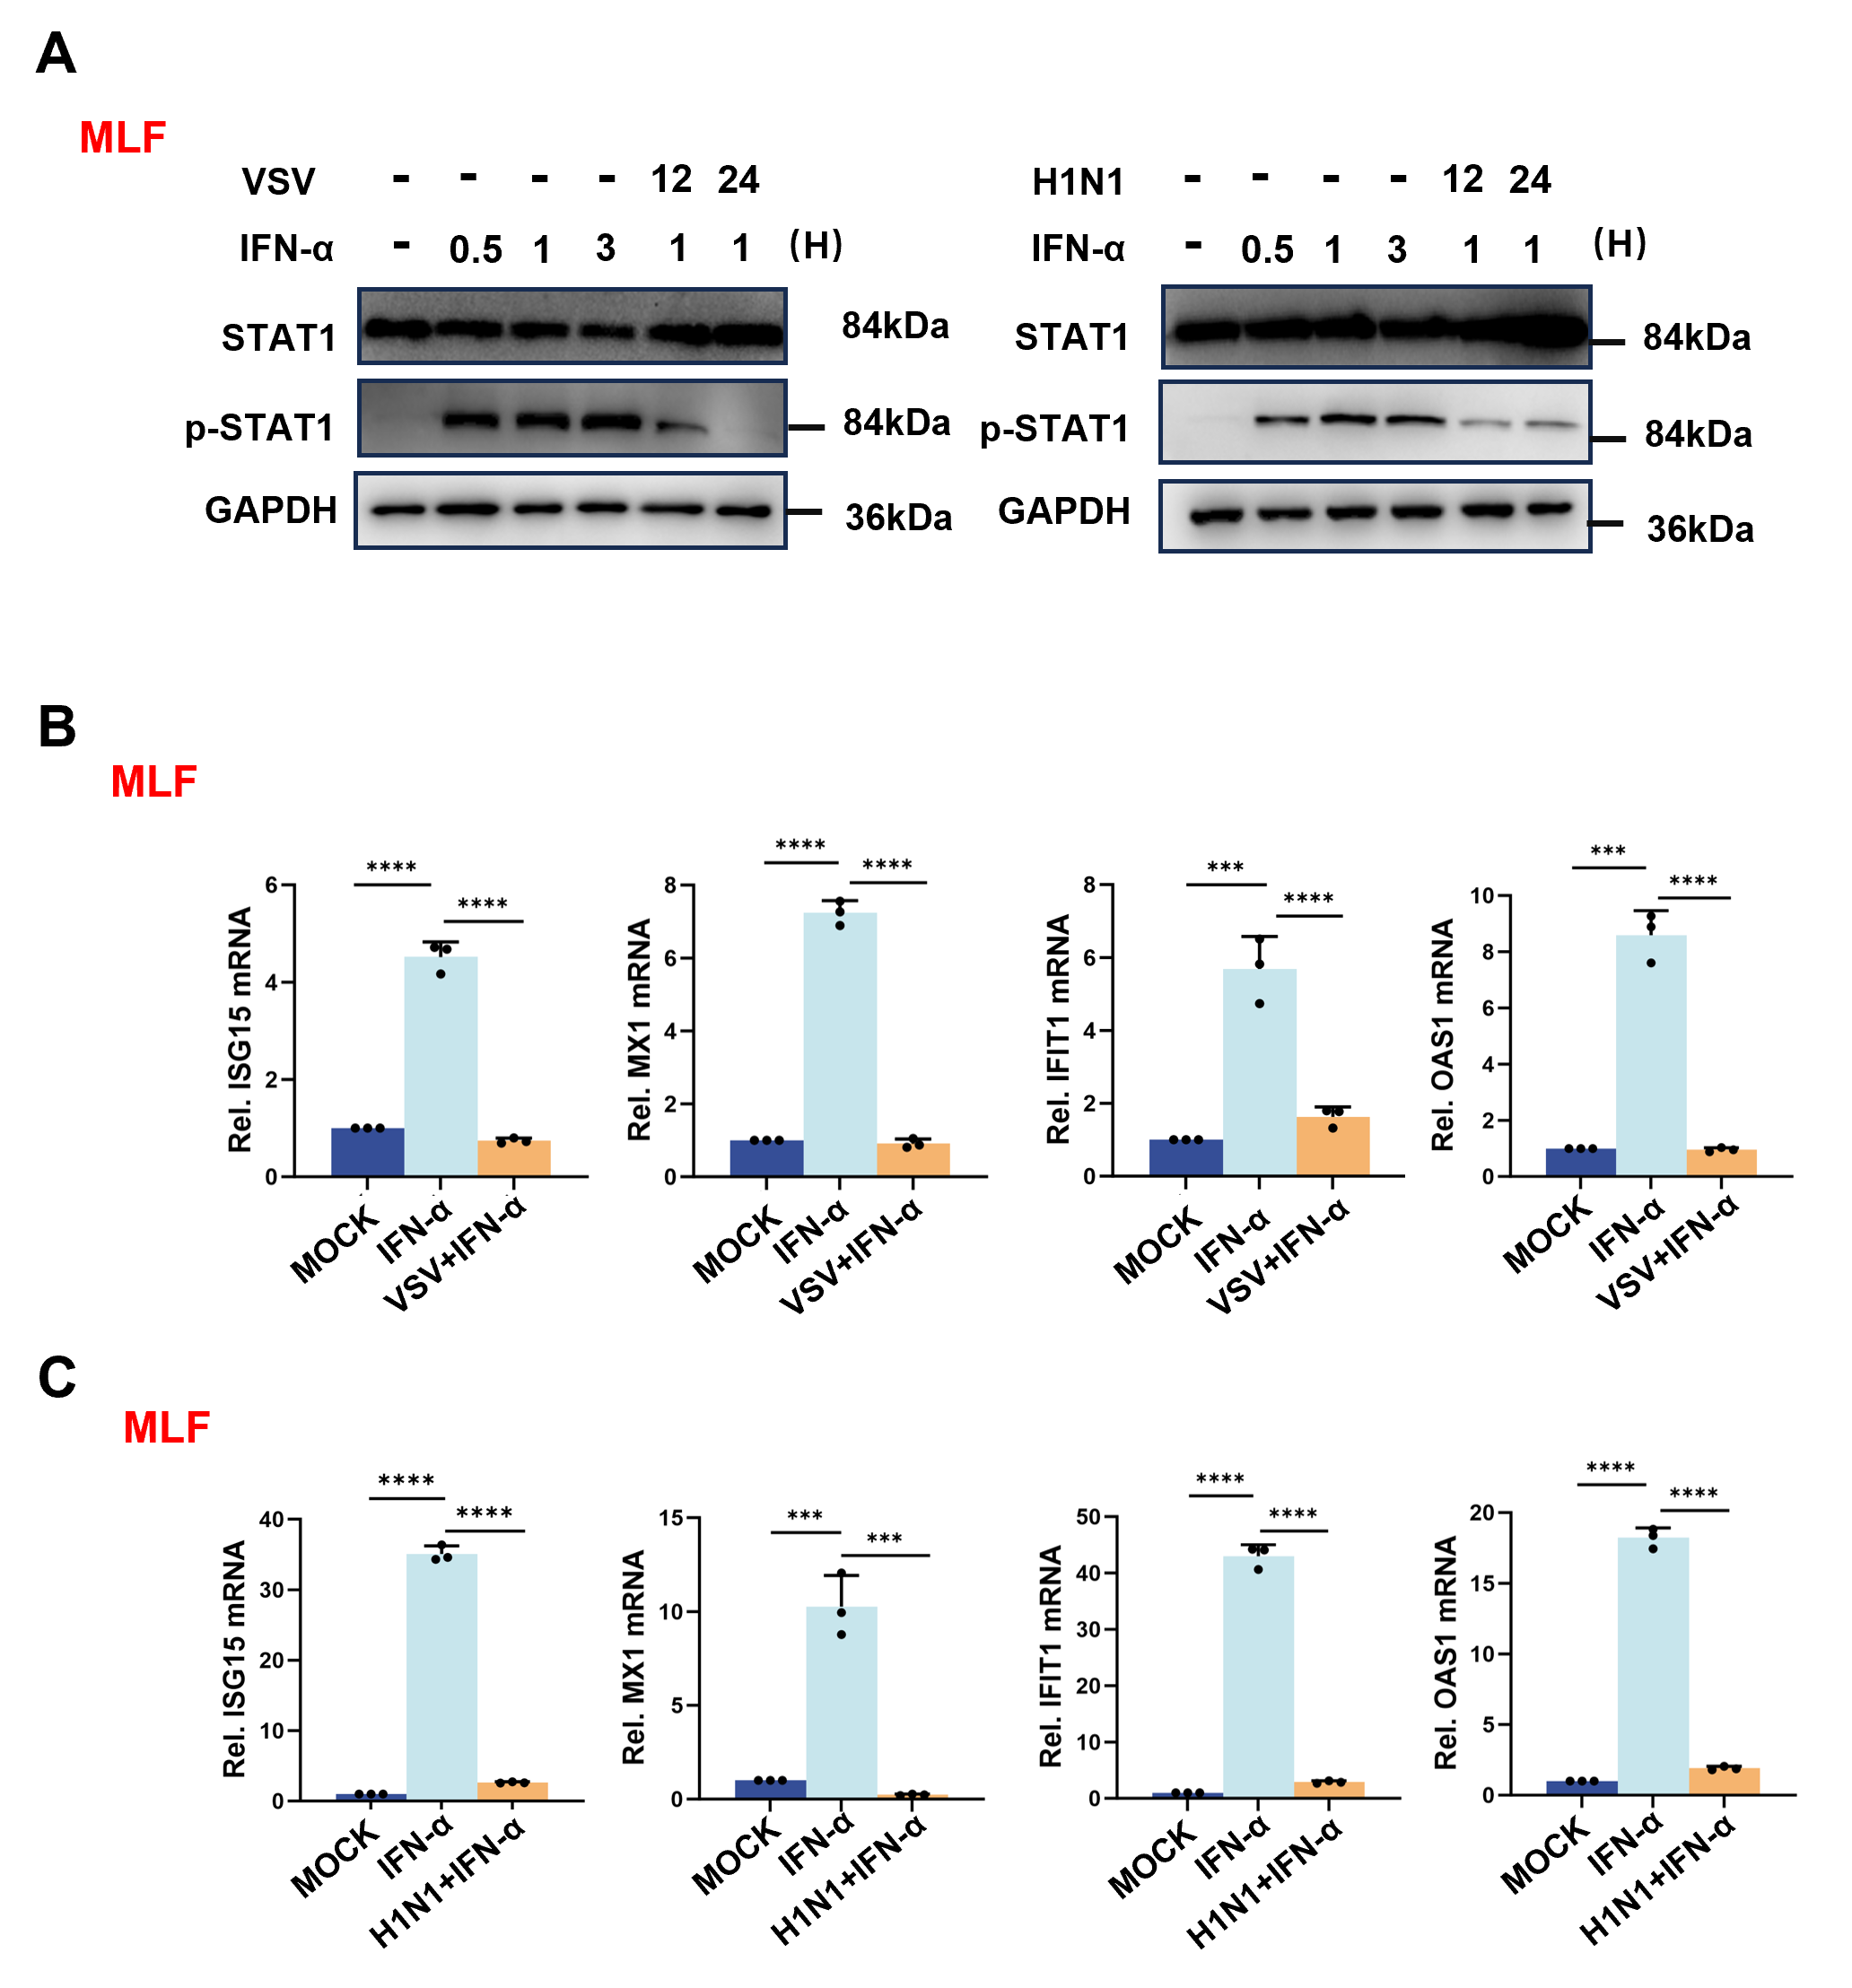
**

**Figure S4 Established Viral Infection Suppresses IFN-α Signaling Transduction​**

(A-C) qPCR analyses of *p-STAT1* expression in IFN-α-treated MLFs with or without viral infection.

**
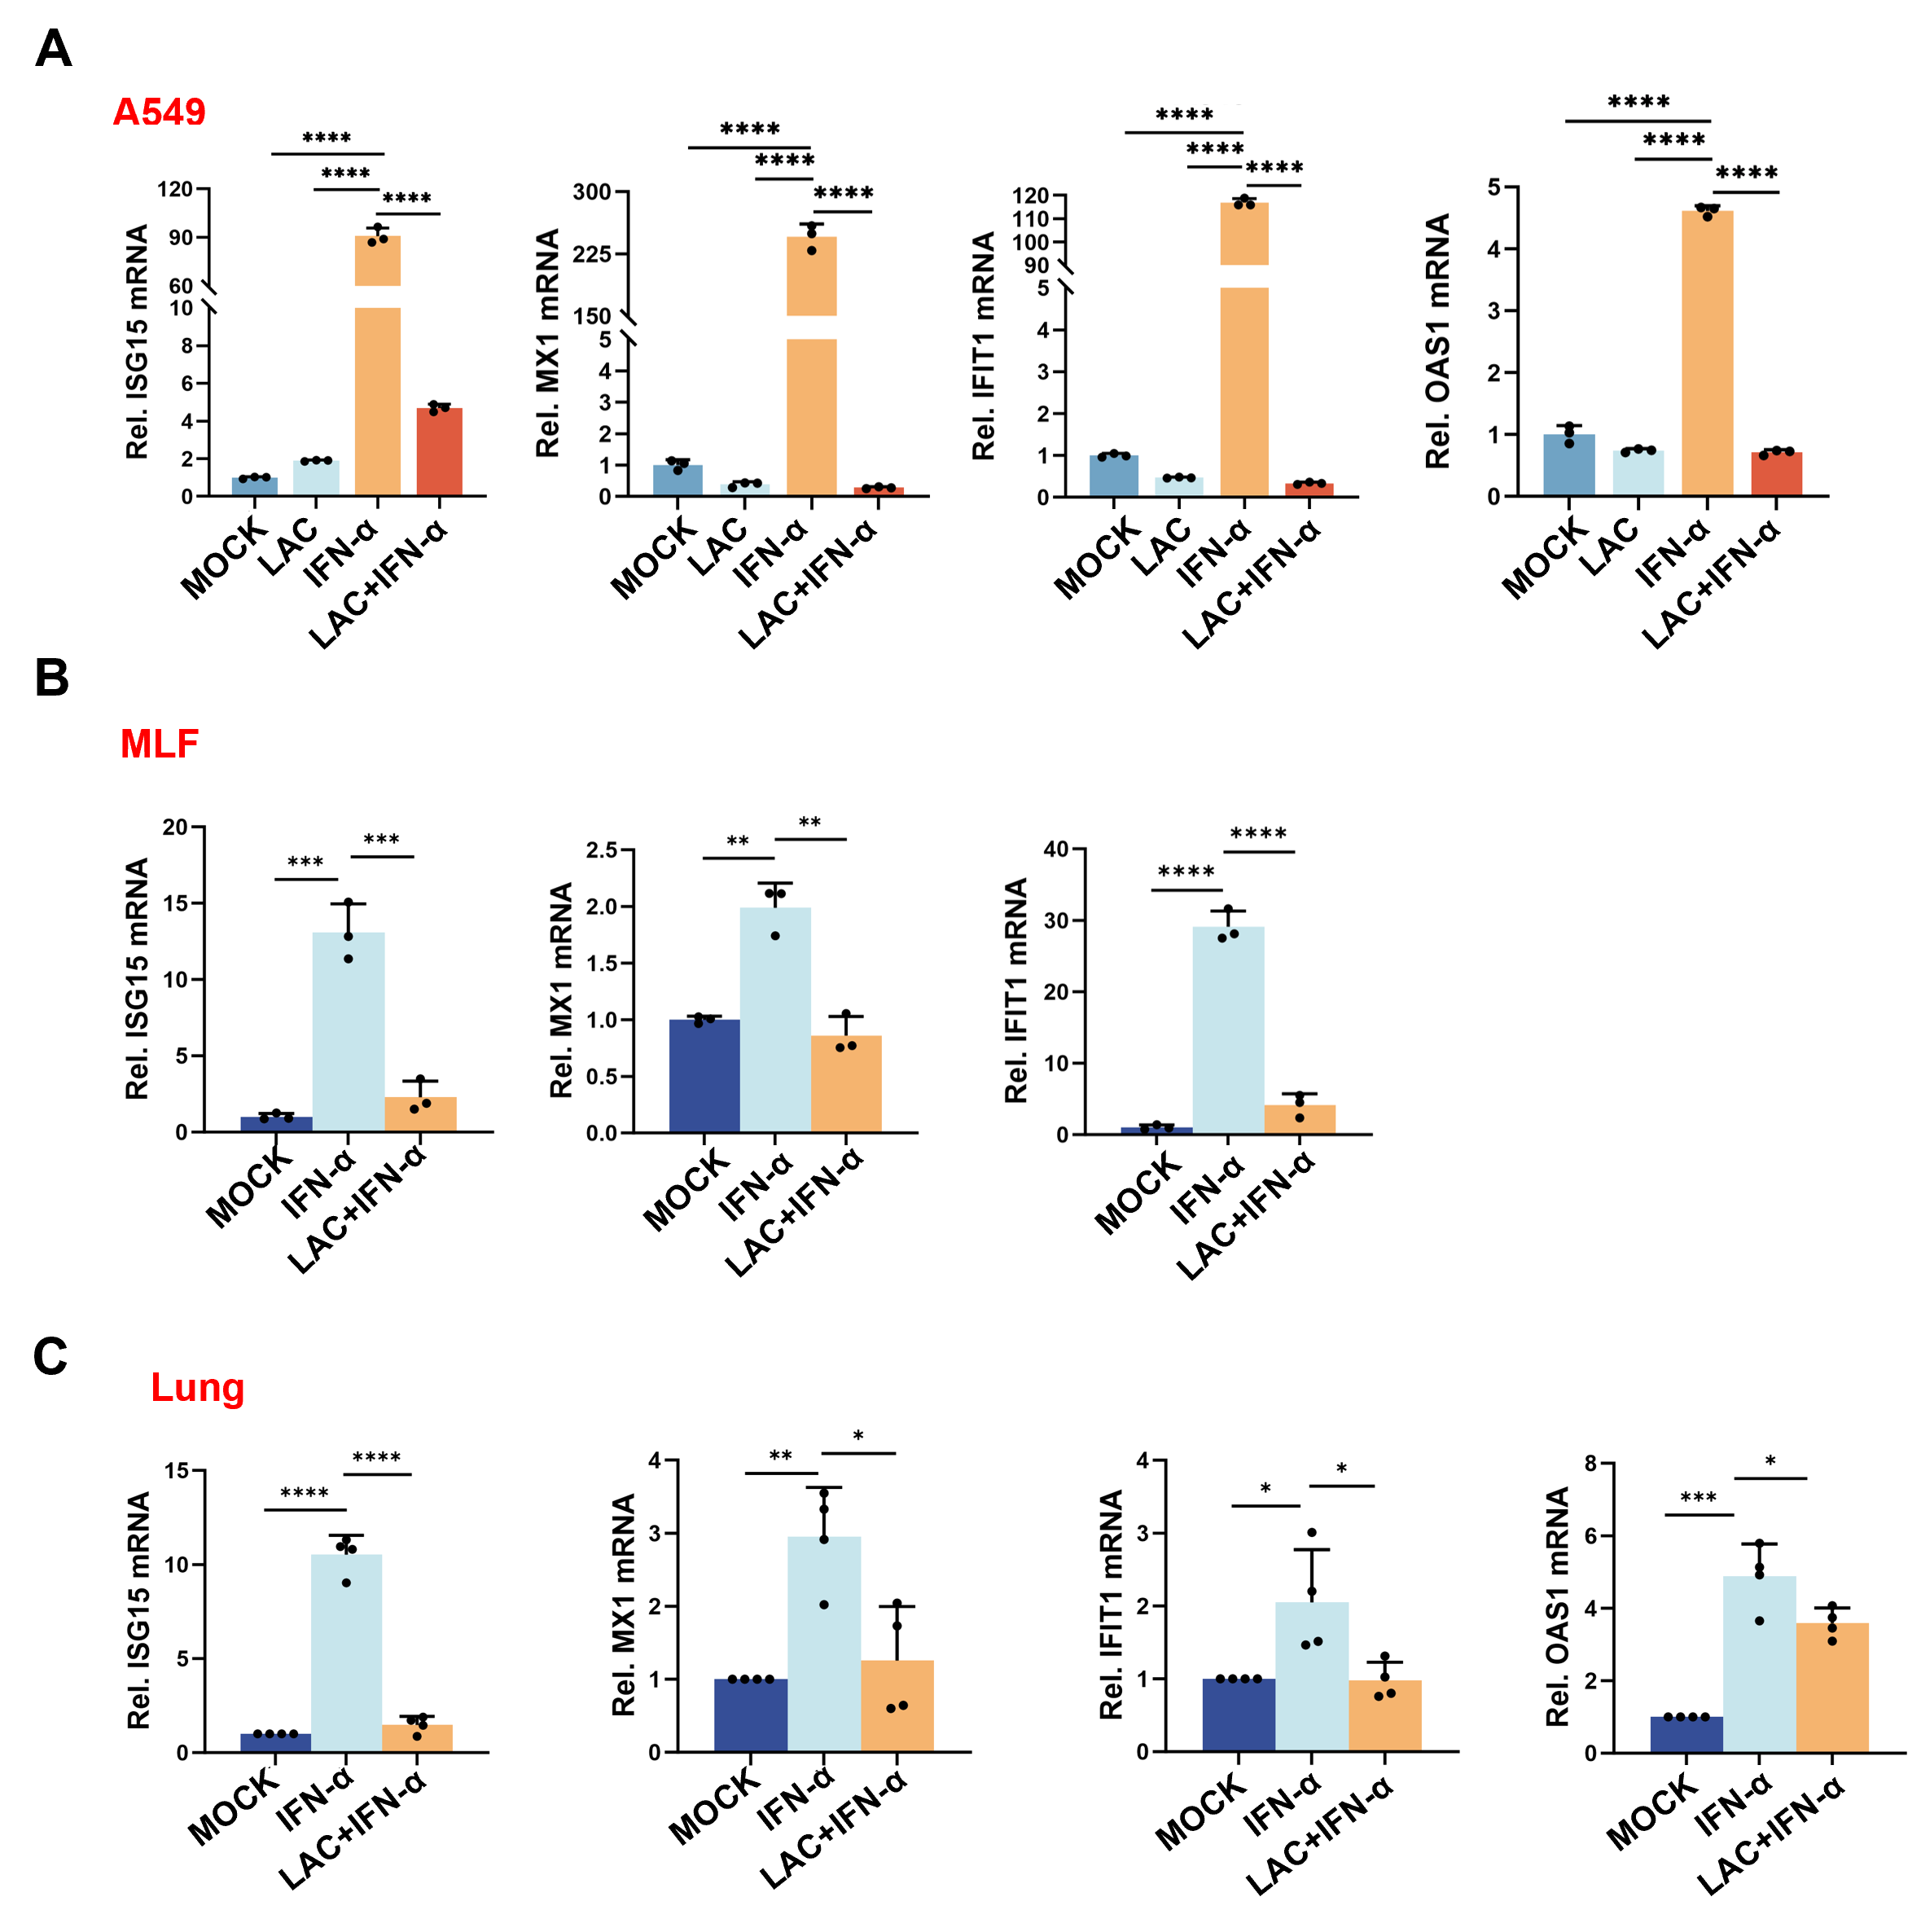
**

**Figure S5 Lactic Acid Mediates the Suppression of IFN-α Antiviral Signaling After Viral Infection**

(A and B) qPCR analysis of key upstream and downstream factors of the JAK-STAT signaling pathway in A549 and PM cells treated with LAC and IFN-α.

(C) qPCR analysis of key downstream factors of the JAK-STAT signaling pathway in mice treated with LAC and IFN-α.

**
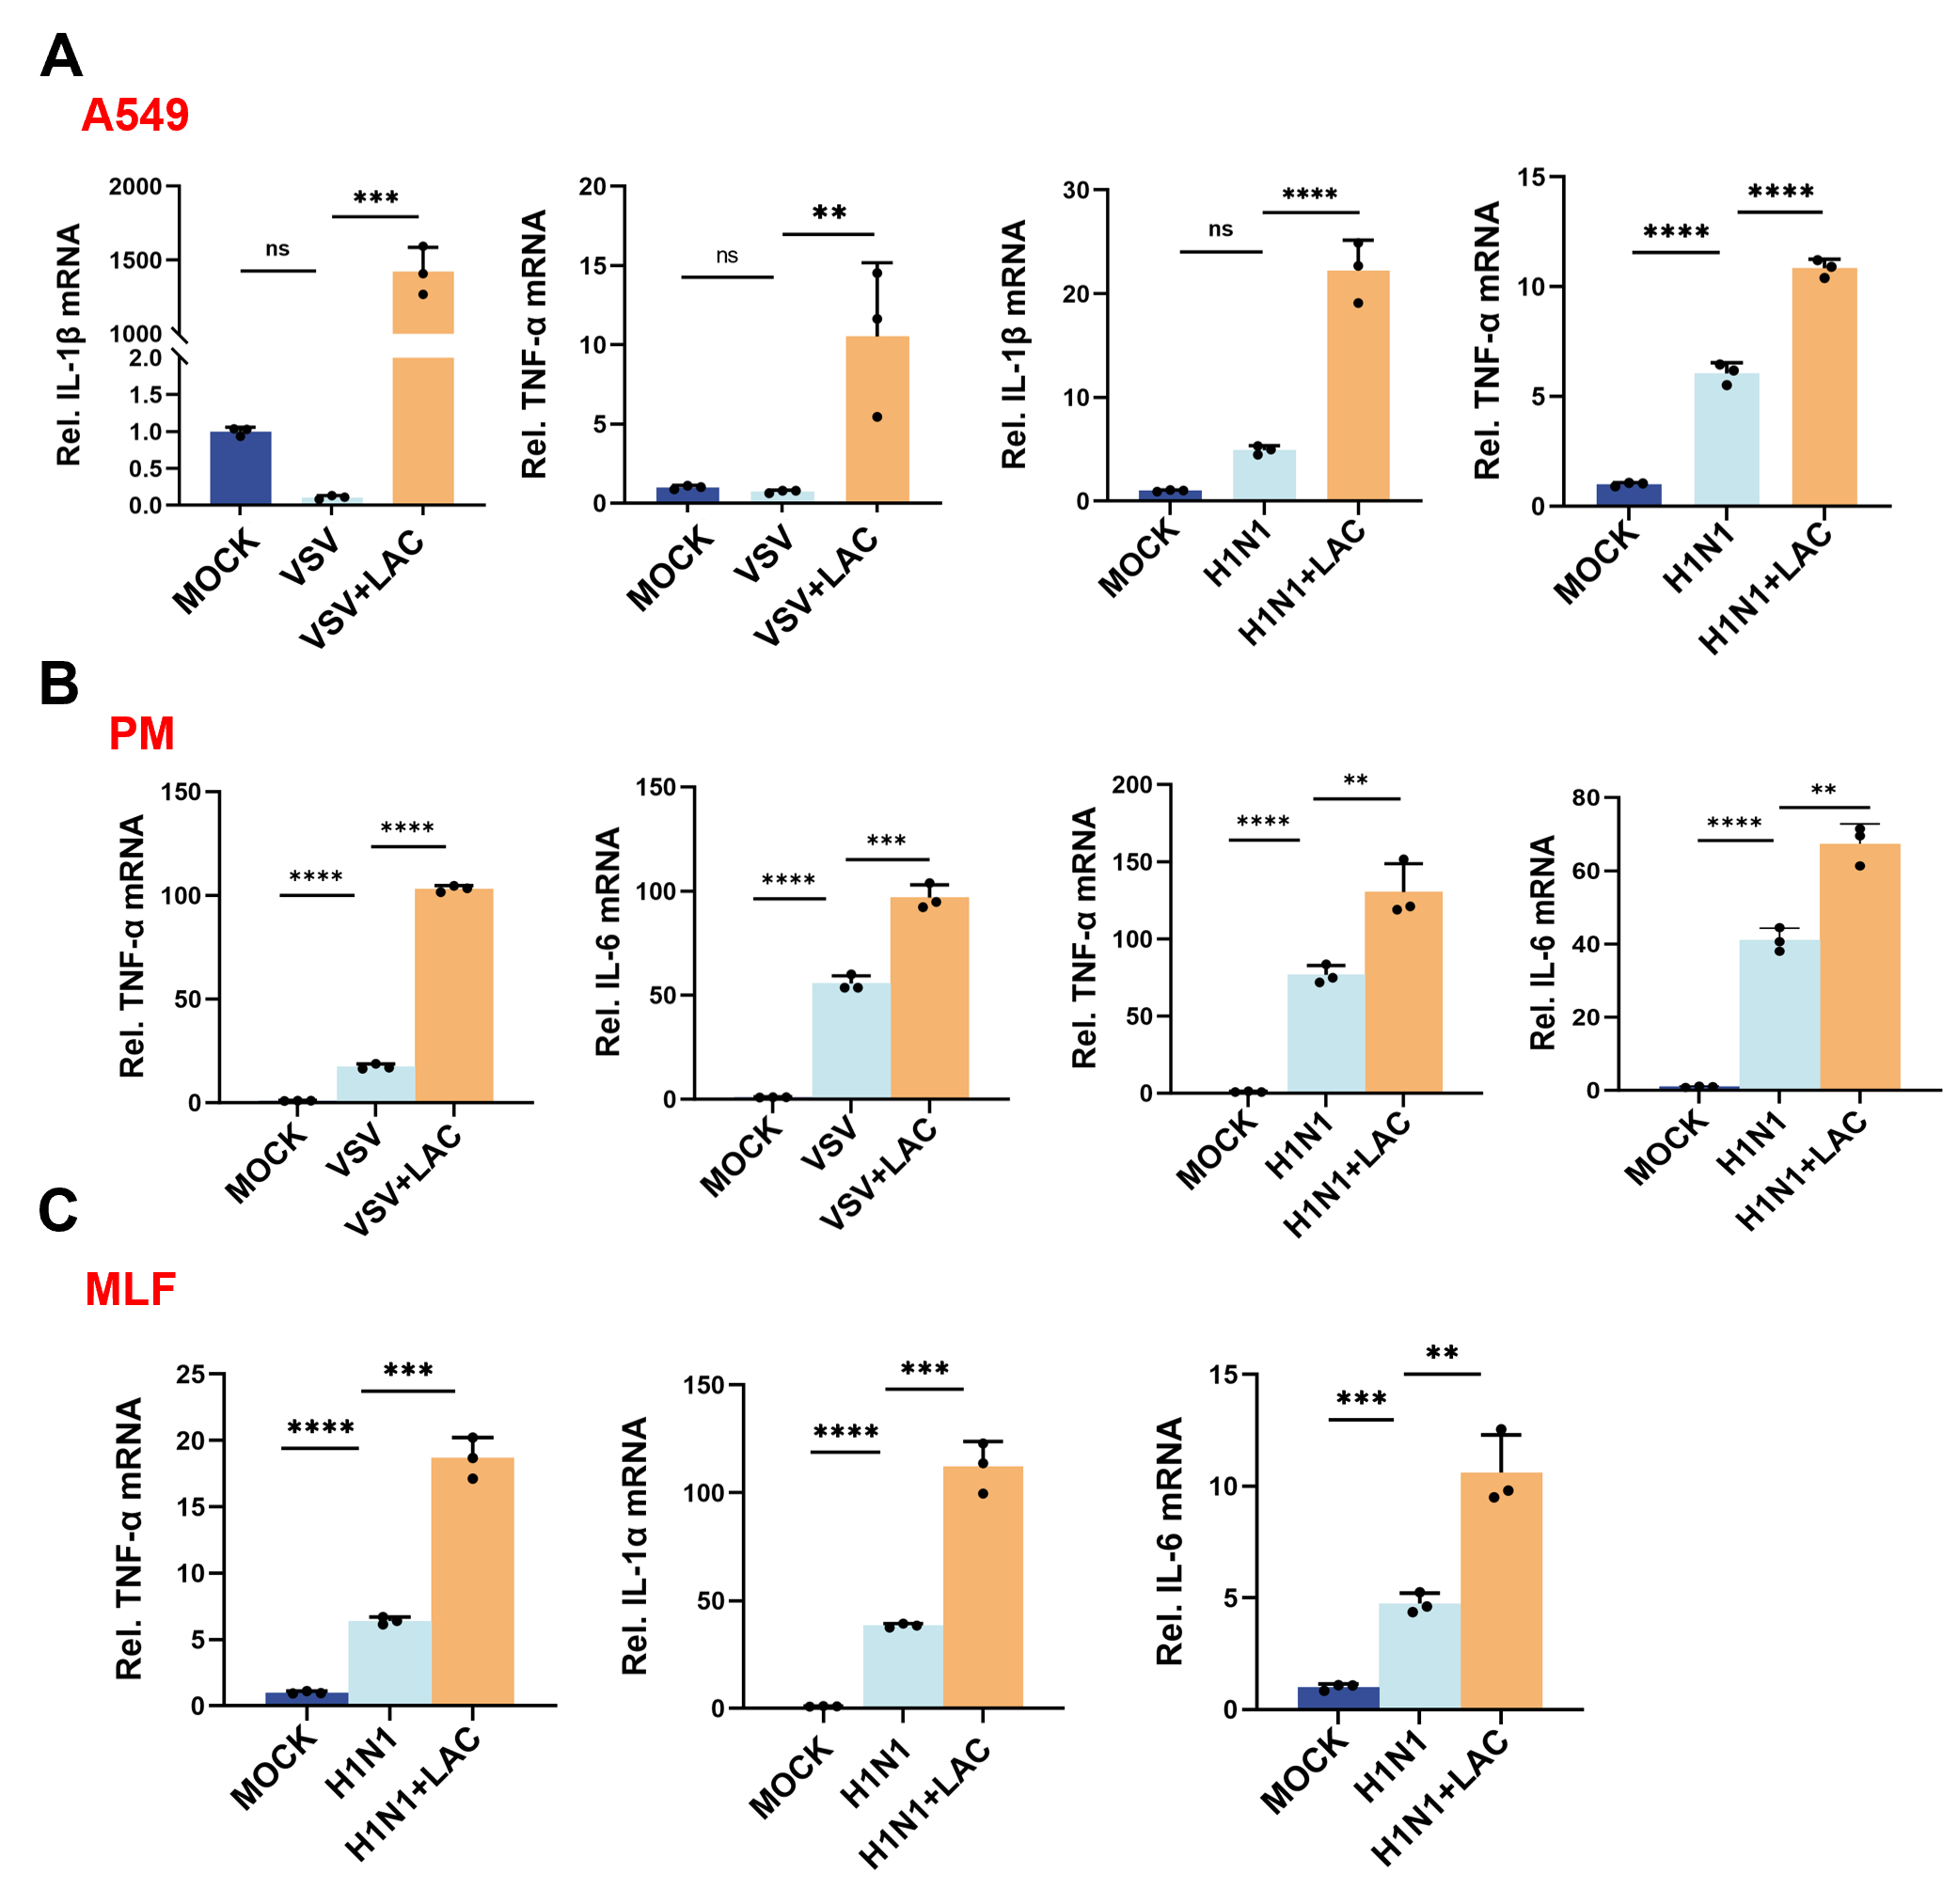
**

**Figure S6 Lactic Acid Triggers the Proinflammatory Effects of Interferon​**

(A-C) qPCR analysis of NF-κB signaling pathway downstream factors (*IL-1α, IL-6, and TNF-α*) in A549, PMs, and MLFs infected with VSV or H1N1 and co-stimulated with LAC concurrently.

**
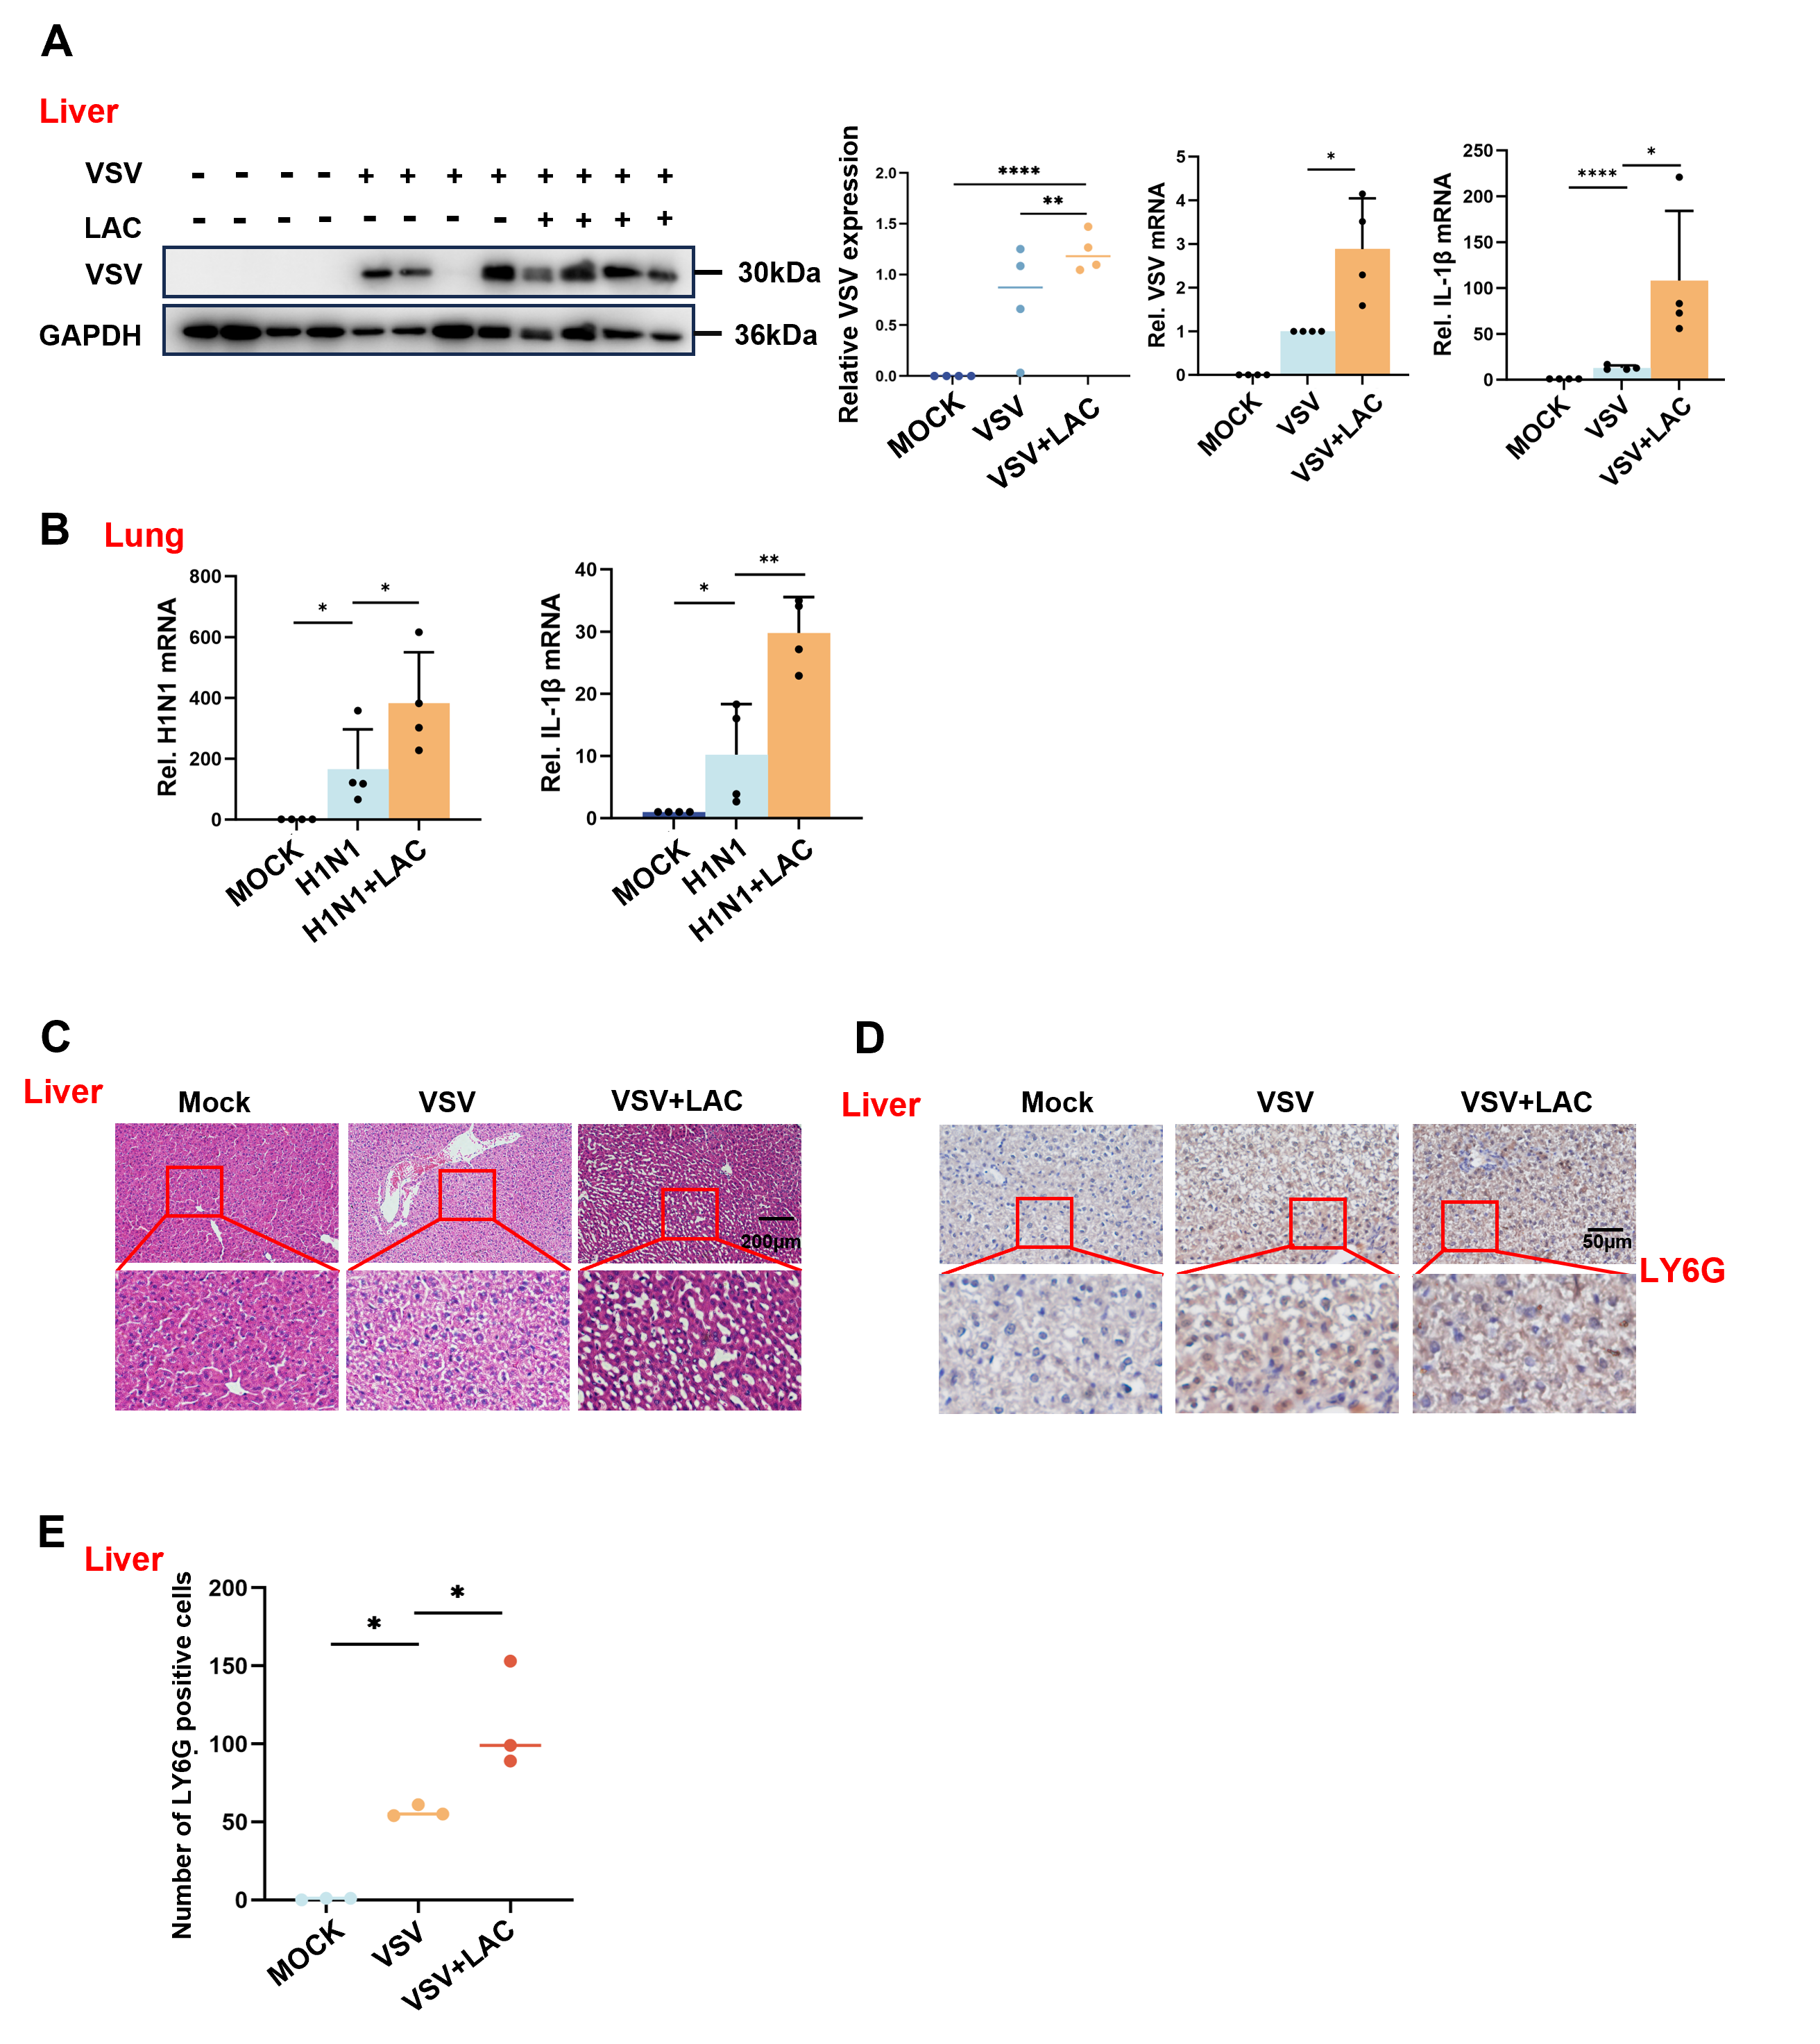
Figure S7 Lactic Acid Triggers the Proinflammatory Effects of Interferon​**

(A) Western blot analysis, densitometric quantification, and RT-PCR of vesicular stomatitis virus (VSV) in liver tissues of virus-infected mice treated with LAC concurrently. Data are presented as mean ± SD; n = 3. ∗p < 0.05, ∗∗p < 0.01, ∗∗∗∗p < 0.01.​

(B) qPCR analysis of H1N1 and *IL-1β* in lung tissues of virus-infected mice treated with LAC concurrently. Data are presented as mean ± SD, n = 3. ∗p <0.05, ∗∗p < 0.01.​

(C-E) H&E staining and IHC (LY6G) staining of H1N1-infected mouse liver tissues treated with LAC concurrently. Quantification of LY6G-positive cells. Data are presented as mean ± SD; n = 3. ∗∗p < 0.01.

**
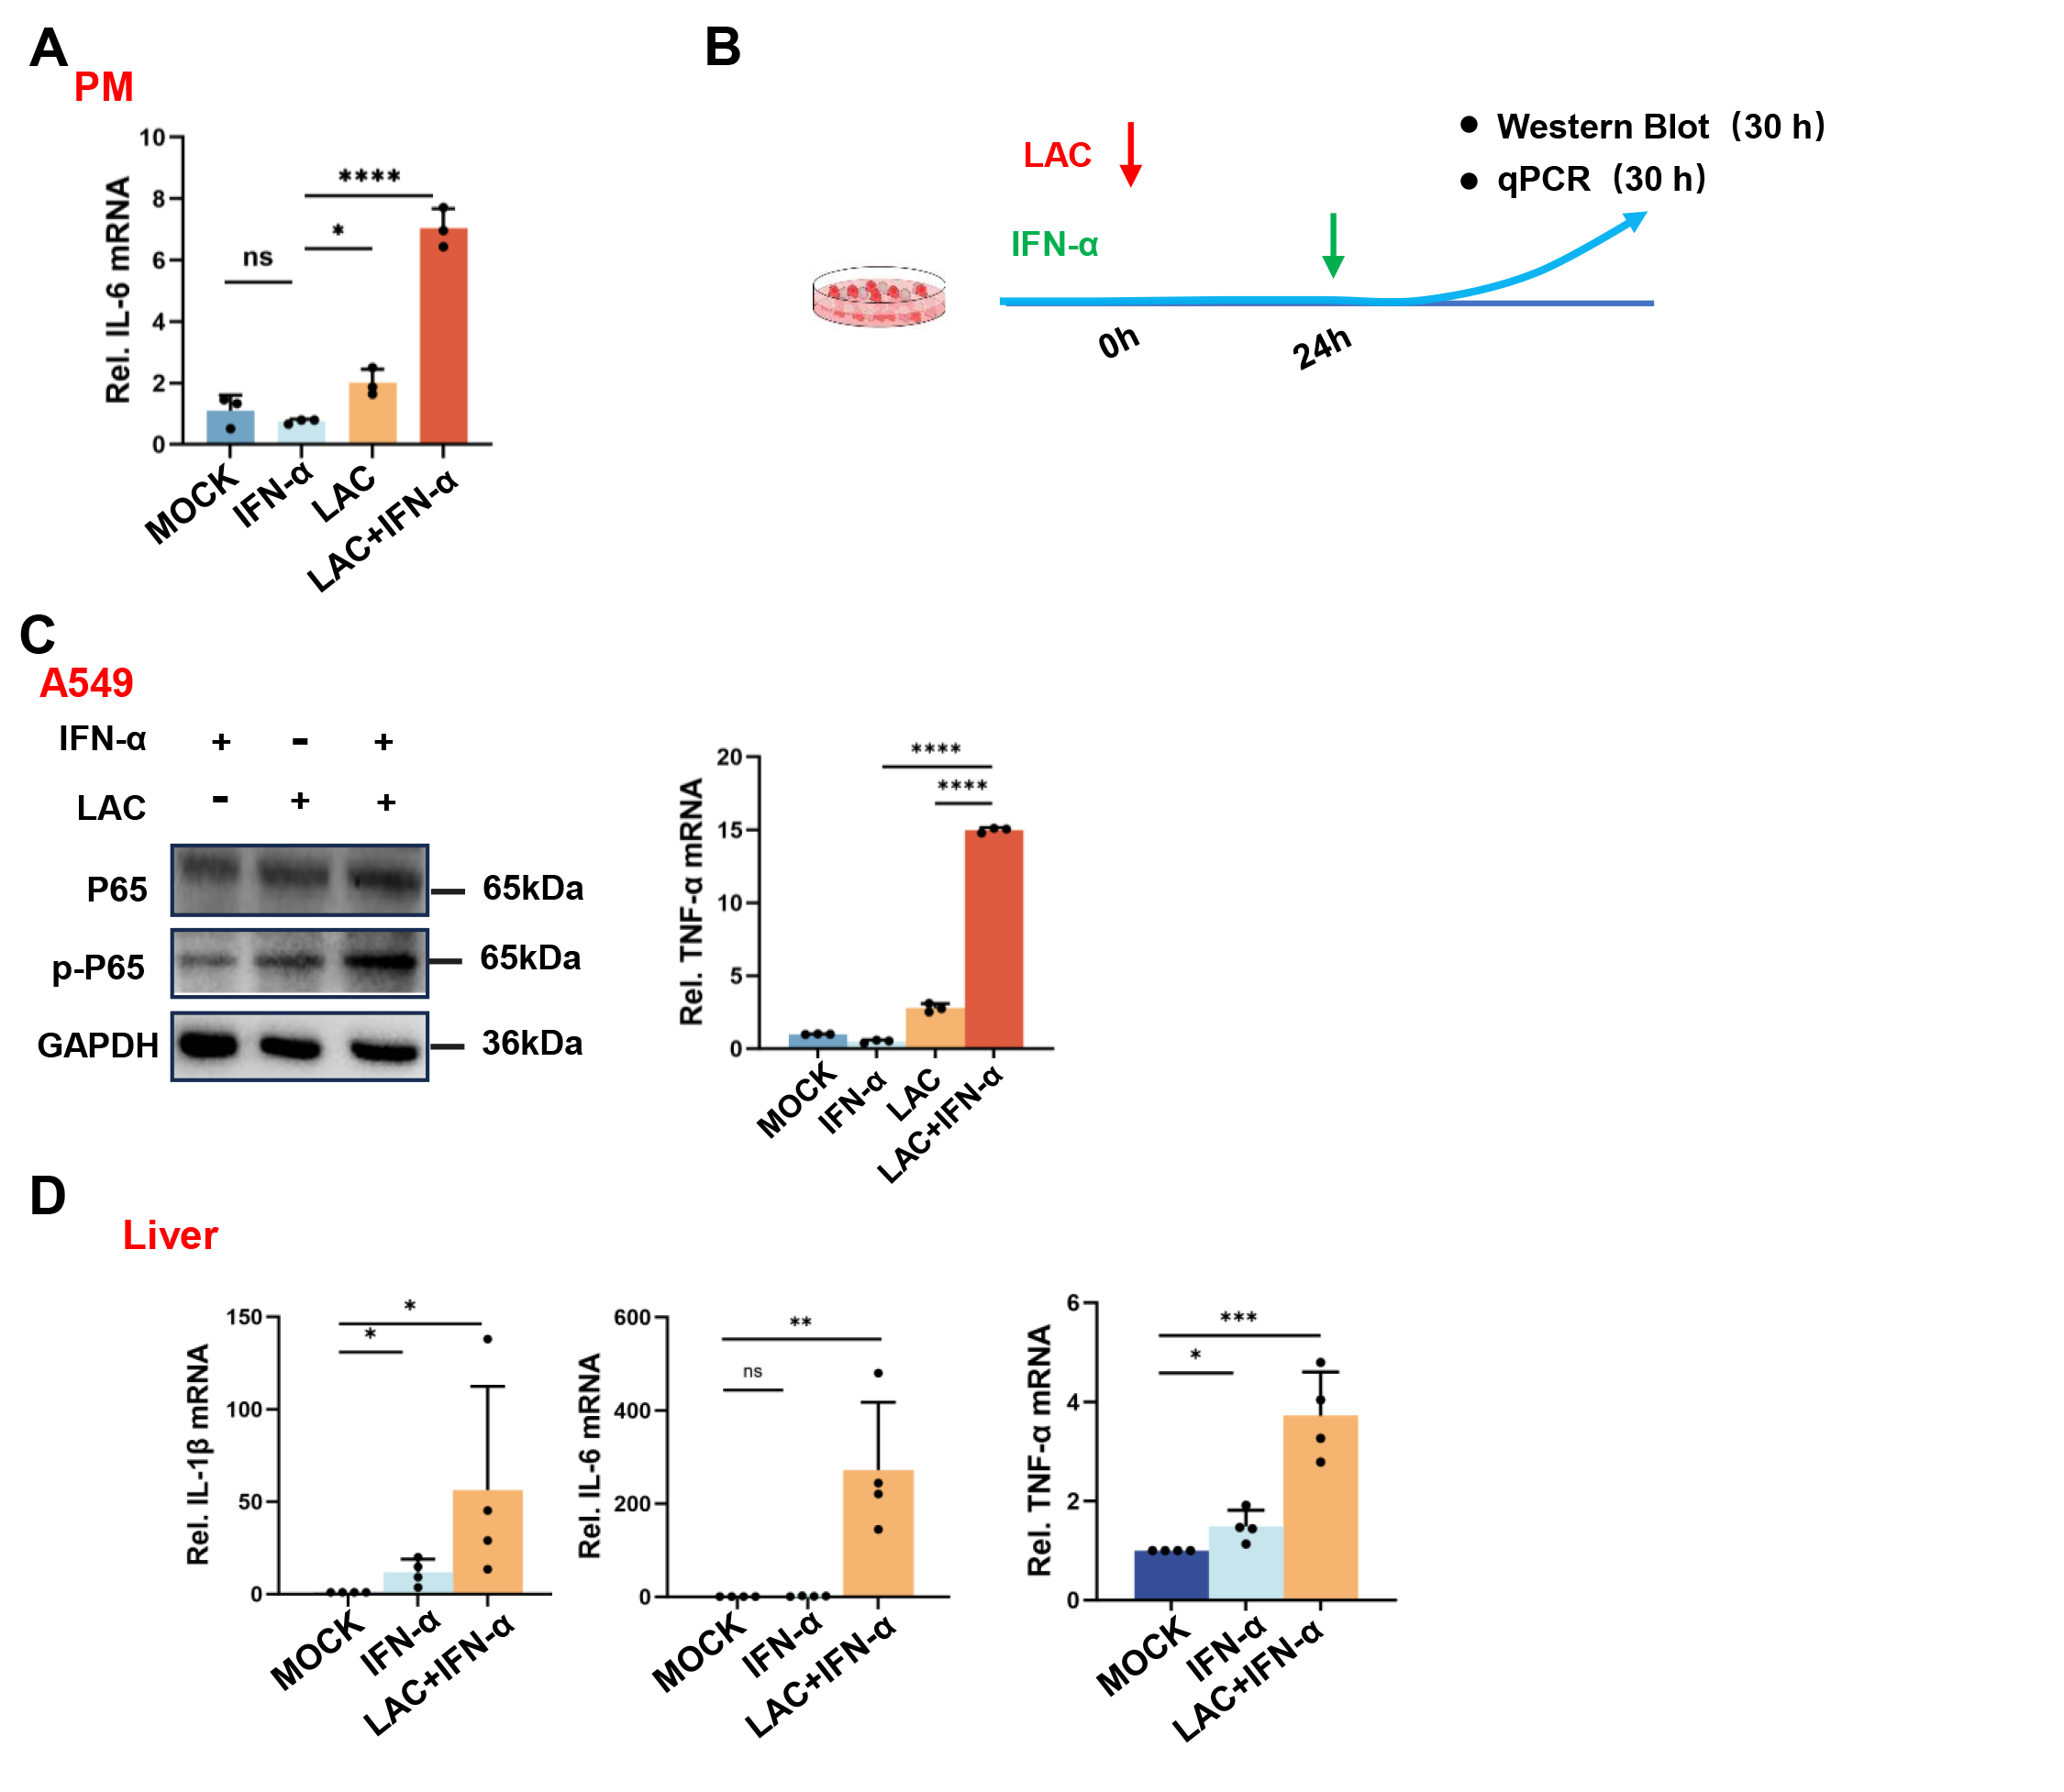
Figure S8 Lactic Acid Triggers the Proinflammatory Effects of Interferon**

(A) qPCR analysis of *IL-6* in PMs pretreated with LAC for 12 h followed by IFN-α stimulation for 3 h.

(B) qPCR analysis of key downstream factors of the NF-κB signaling pathway (*IL-1β, IL-6, and TNF-α*) in MLFs cells pretreated with LAC for 12 h followed by IFN-α stimulation for 3 h.

(C) Schematic of cells treated with IFN-α following LAC stimulation. A549 cells were stimulated with LAC for 24 h, followed by IFN-α treatment for 6 h.

(D) Western blot analysis of *p-P65* and RT-PCR analysis of *TNF-α* in A549 cells pretreated with LAC for 12 h followed by IFN-α stimulation for 6 h.

**
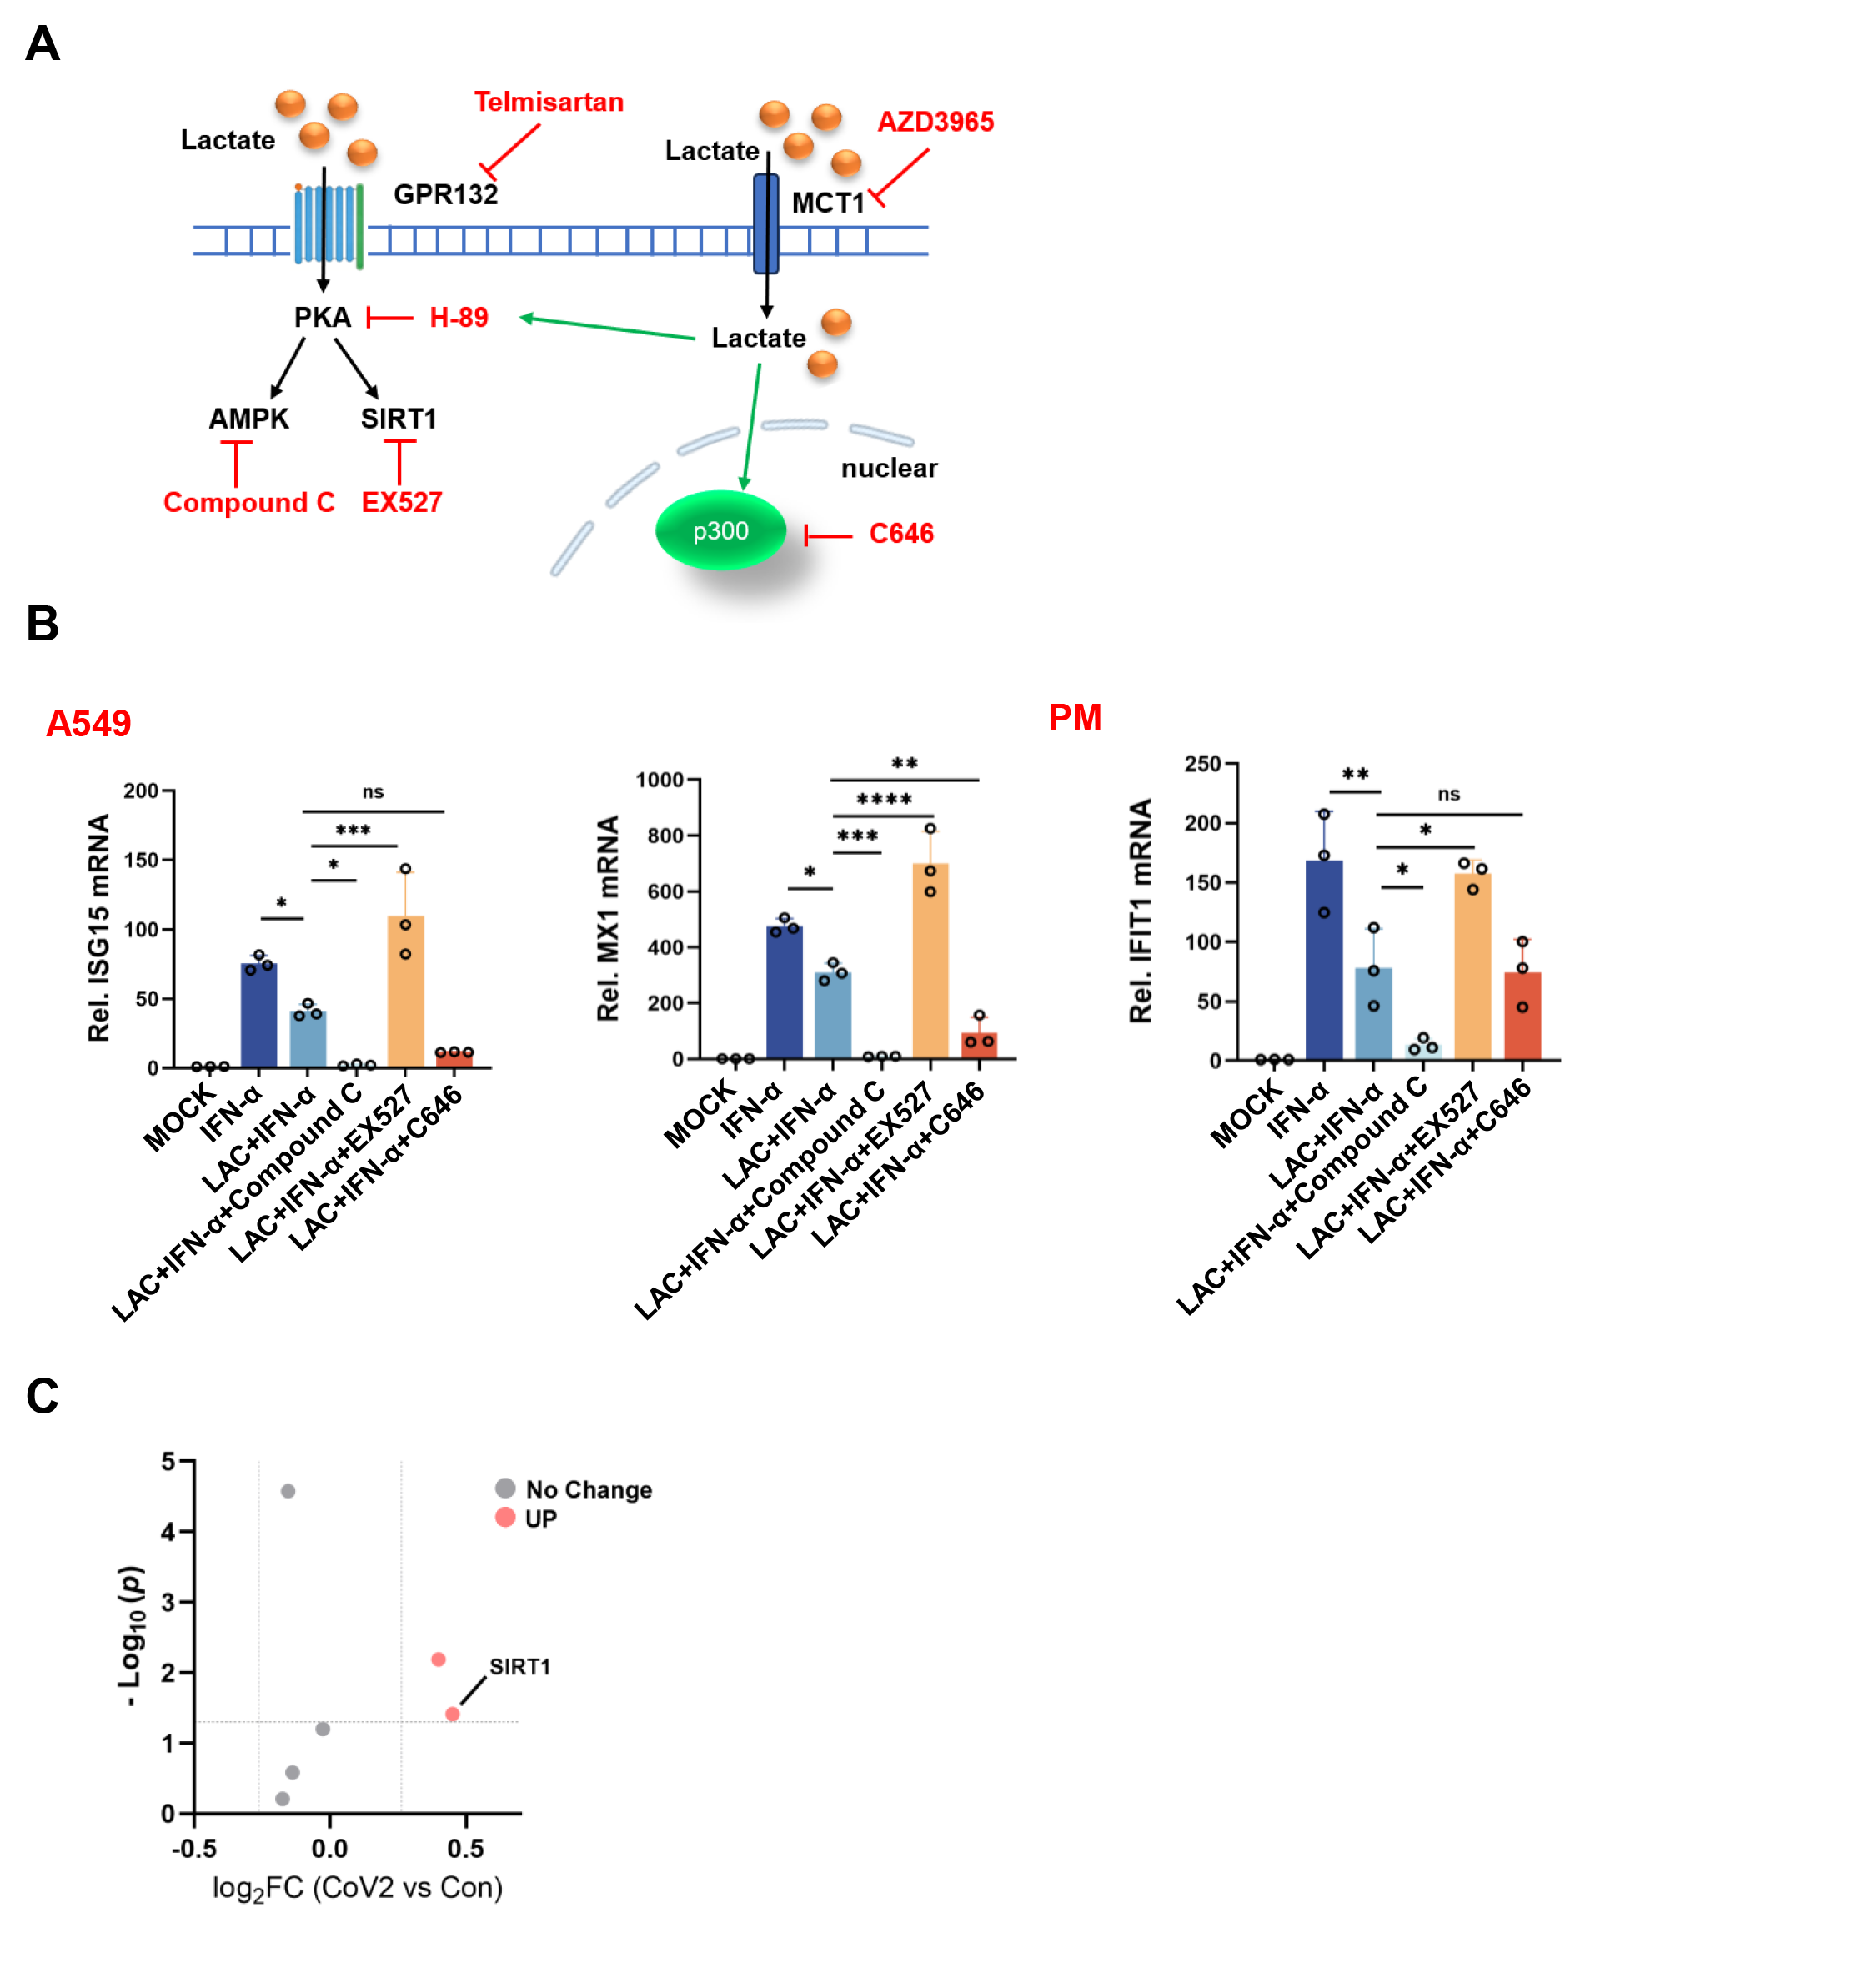
Figure S9 Lactic Acid Attenuates Antiviral JAK-STAT Signaling Through PKA-SIRT1 Axis Activation**

(A) Schematic diagram illustrating the molecular mechanism of LAC signaling pathway and regulation of related targets.​

(B) qPCR analysis of key factors of the JAK-STAT signaling pathway (*ISG15, MX1, and IFIT1*) in A549 and PMs cells co-treated with GPR132-PKA-SIRT1/AMPK pathway inhibitors (Compound C, EX527), p300 inhibitor (C646), LAC, and IFN-α.

(C) High-throughput sequencing analysis of SIRT1 in bronchoalveolar lavage fluid (BALF) from COVID-19 patients and healthy individuals.

**
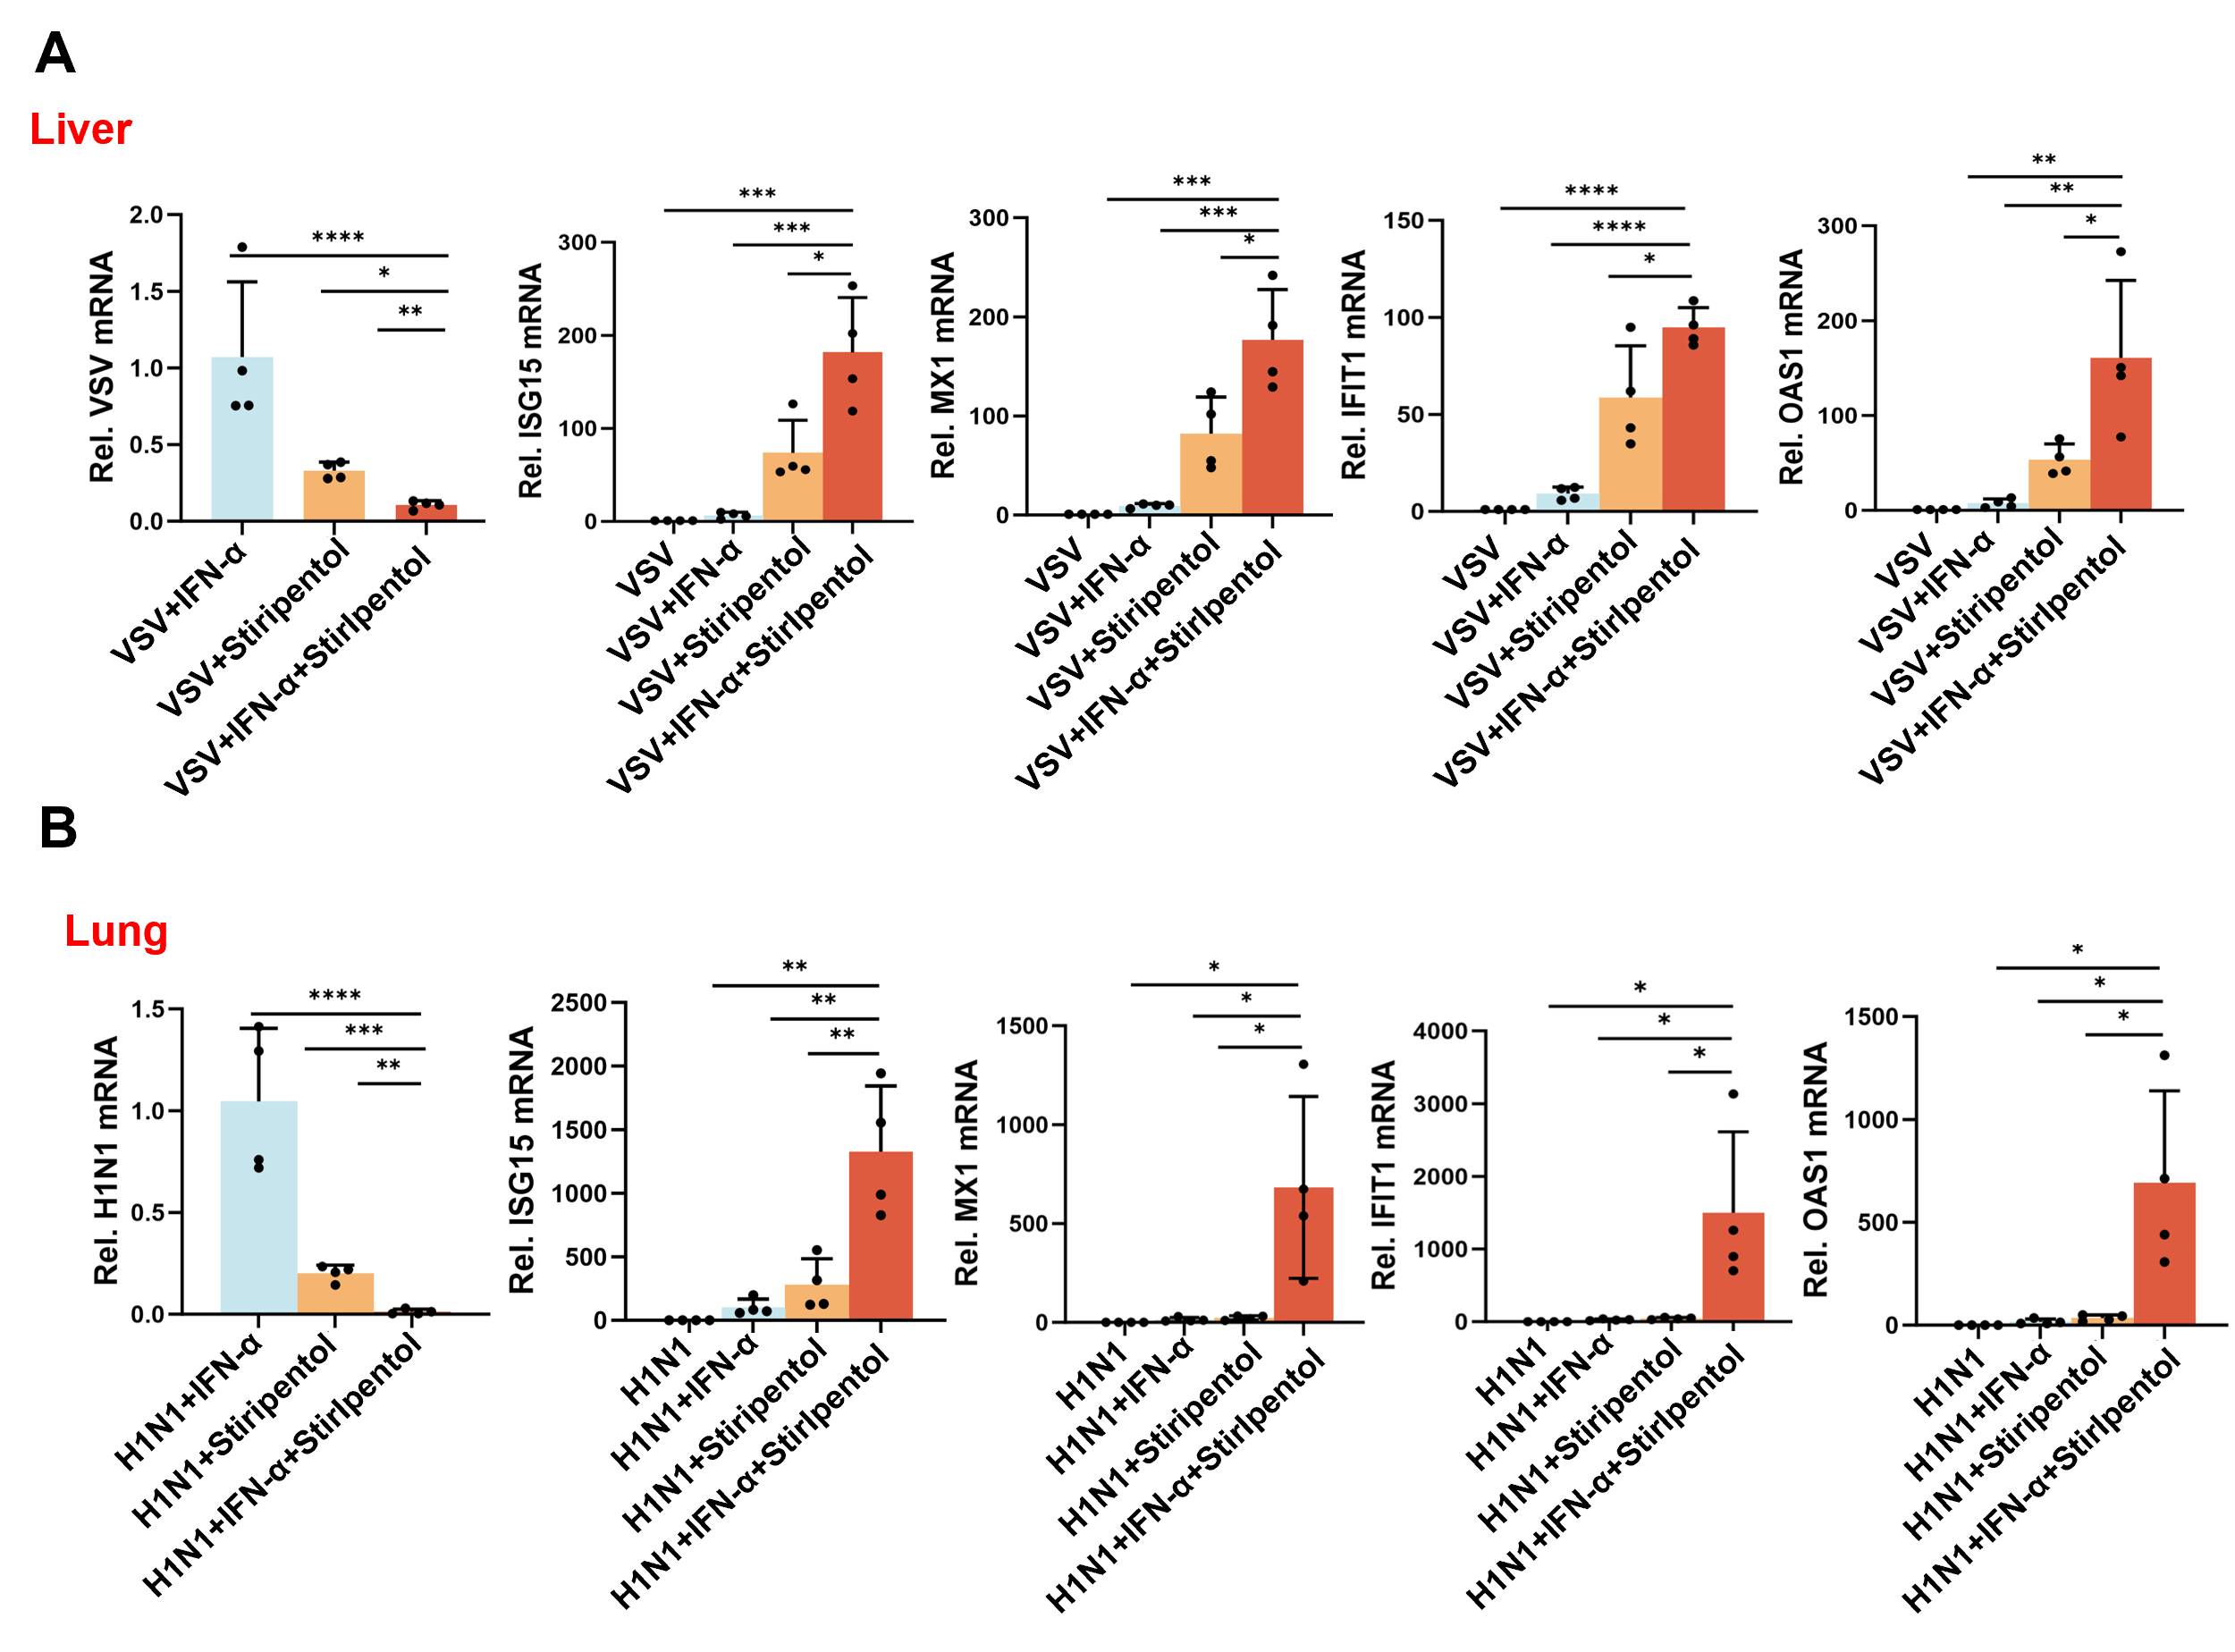
Figure S10 Combined Administration of Stiripentol and IFN-α Synergistically Inhibits Viral Replication and Inflammatory Responses​​**

(A and B) qPCR analysis of viral replication levels and key downstream inflammatory factors of the NF-κB signaling pathway (*IL-1β, MX1, IFIT1, OAS1*) in liver and lung tissues of infected mice treated with Stiripentol combined with IFN-α. Data are presented as mean ± SD; n = 3. ∗p .05, ∗∗p < 0.01, ∗∗∗p < 0.001, ∗∗∗∗p < 0.0001.​

**
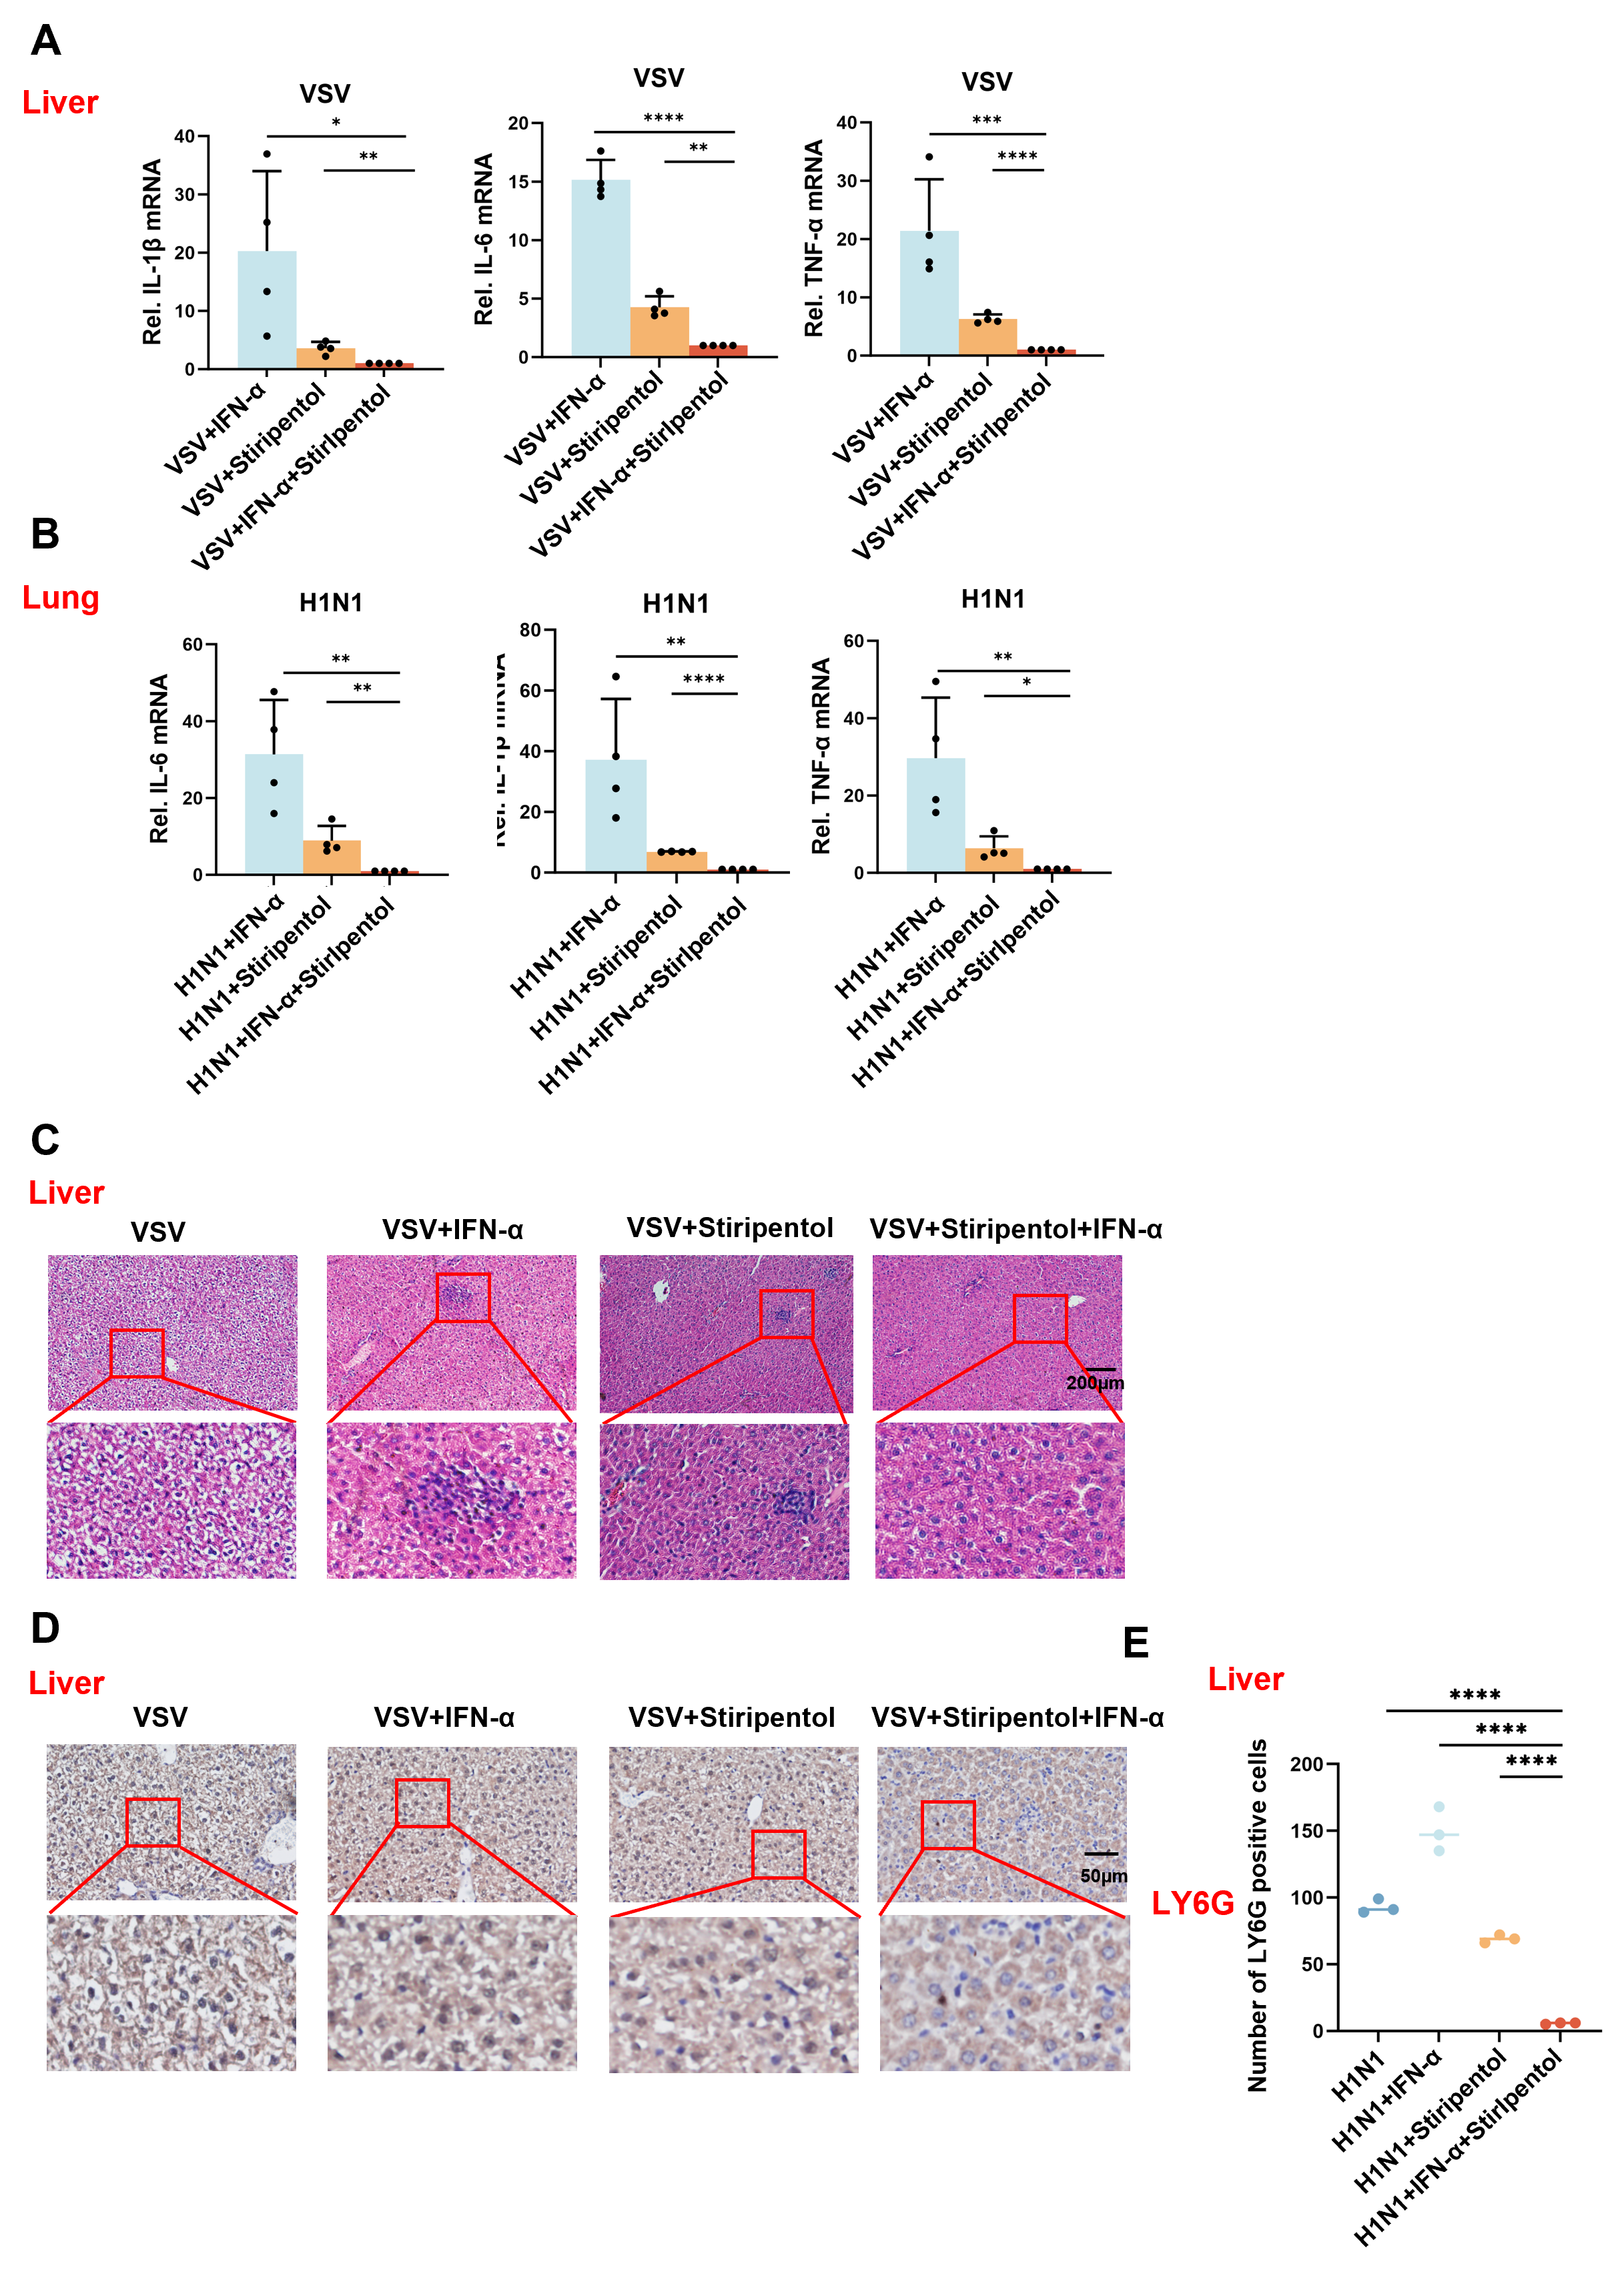
**

**Figure S11 Combined Administration of Stiripentol and IFN-α Synergistically Inhibits Viral Replication and Inflammatory Responses​​**

(A and B)qPCR analysis of viral replication levels and key downstream inflammatory factors of the NF-κB signaling pathway *(IL-1β, MX1, IFIT1, OAS1*) in liver and lung tissues of infected mice treated with Stiripentol combined with IFN-α. Data are presented as mean ± SD; n = 3. ∗p < 0.05, ∗∗p , ∗∗∗p < 0.001, ∗∗∗∗p < 0.0001.​

(C and D) H&E staining and IHC (LY6G) staining of liver tissues of infected mice treated with Stiripentol combined with IFN-α. Histopathological changes were observed; liver and lung tissues were subjected to IHC staining for LY6G.​

(E) Quantification of LY6G-positive cells in lung tissues. Data are presented as mean ± SD; n = 3. ∗∗∗∗p < 0.0001.

**Table S1-2**

**Table S1 Reagent list**

| **REAGENT or RESOURCE** | **SOURCE** | **IDENTIFIER** |
| --- | --- | --- |
| **Antibodies** |  |  |
| Stat1 Antibody  Rabbit Monoclonal anti-Stat1 (phosTyr701) (58D6)  Rabbit Monoclonal anti-NF-κB p65 (phosSer536) (93H1)  Rabbit Monoclonal anti-ISG15  Rabbit polyclonal anti-SIRT1  Rabbit Monoclonal anti-NF-κB p65/RelA  Mouse Monoclonal anti-GAPDH  Mouse Monoclonal anti-GFP  Mouse Monoclonal anti-Beta Actin  Anti-Mouse LY-6G(iA8)  Rabbit Monoclonal anti-L-Lactyl Lysin  Mouse Monoclonal anti-HA  Rat Two-Step Kit  Rabbit polyclonal anti-Influenza A virus Nucleoprotein | Cell Signaling Technology  Cell Signaling Technology  Cell Signaling Technology  ABclonal  ABclonal  ABclonal  Proteintech  Proteintech  Proteintech  Proteintech  PTM Biolab  OriGene  OriGene  GeneTex | Cat# 9172; RRID:AB_2198300  Cat# 9167; RRID:AB_561284  Cat# 3033; RRID:AB_331284  Cat# A2416; RRID:AB_2863006  Cat# A111267; RRID:AB_2861537  Cat# A22331; RRID:AB_2936188  Cat# 60004-1-Ig; RRID:AB_2107436  Cat# 66002-1-Ig; RRID:AB_11182611  Cat# 66009-1-Ig; RRID:AB_2687938  Cat# 65078-1-Ig; RRID:AB_2918382  Cat# PTM-1401RM; RRID:AB_2687938  Cat# TA180128s  Cat# PV-9004  Cat# 125989 |
| **Bacterial and Virus Strains** |  |  |
| VSV-GFP  H1N1 | Prof. Kailang Wu (Wuhan U. China)  Prof. Kailang Wu (Wuhan U. China) | N/A  N/A |
| **Chemicals and Recombinant Proteins** |  |  |
| L(+)-Lactic acid  Recombinant Mouse IFN-α (carrier-free)  IFN-α2a  Recombinant Mouse IFN-alpha 2 Protein  H-89  Telmisartan  AZD3695  Dorsomorphin(Compound C)  C646  Selisistat（EX527）  Stiripentol  2-Deoxy-D-glucose(2-DG)  PEI  Triton X-100  TPCK  TRIzol  Lipofectamine 3000 | MACKLIN  BioLegend  Yintefen  ABclonal  TargetMOI  TargetMOI  TargetMOI  TargetMOI  TargetMOI  TargetMOI  TargetMOI  Sigma-Aldrich  Sigma-Aldrich  Sigma-Aldrich  Sigma  KEEP  Thermo Fisher | Cat# 79334  Cat# 752802  N/A  Cat# RP01725  Cat# T11524  Cat# T1570  Cat# T3210  Cat# T1977  Cat# T2452  Cat# T6111  Cat# 49763-96-4  Cat# D8375  Cat# 919012  Cat# 9002-93-1  Cat# RN0102  Cat# T1426  Cat# L3000008 |
| **Critical Commercial Assays** |  |  |
| ELISA MAX™ Deluxe Set Mouse IL-1β  ELISA Flex: Mouse IL-6 (HRP)  L-Lactic Acid (LA) Colorimetric Assay Kit  ChamQ SYBR qPCR Master Mix  HiScipt Ⅱ Q RT SuperMix for qPCR | Biolegend  MABTECH  Elabscience  Vazyme  Vazyme | Cat# 432604  Cat# 3351-1H-6  Cat# E-BC-K38-M  Cat# 311-02  Cat# 222-01 |
| **Continued** |  |  |
| **REAGENT or RESOURCE** | **SOURCE** | **IDENTIFIER** |
| **Experimental Models: Cell Lines** |  |  |
| Human: HEK293  Human: A549  Human: MDCK | ATCC  ATCC  ATCC | Cat# CRL-11268  Cat# CCL-185  Cat# CCL-34 |
| Monkey: VERO  Mouse: primary peritonea macrophages  Mouse：primary lung fibroblasts | ATCC  This paper  This paper | Cat# CCL-81  N/A  N/A |
| **Experimental Models** |  |  |
| C57BL/6 | N/A | N/A |
| **Table S2 primer list**  **Oligonucleotides** |  |  |
| VSV-N-qPCR-F  VSV-N-qPCR-R  H1N1-PR8-M-qPCR-F  H1N1-PR8-M-qPCR-R  Human-ISG15-qPCR-F  Human-ISG15-qPCR-R  Human-MX1-qPCR-F  Human-MX1-qPCR-R  Human-IFIT1-qPCR-F  Human-IFIT1-qPCR-R  Human-OAS1-qPCR-F  Human-OAS1-qPCR-R  Human-IL1β-qPCR-F  Human-IL1β-qPCR-R  Human-IL6-qPCR-F  Human-IL6-qPCR-R  Human-TNFα-qPCR-F  Human-TNFα-qPCR-R  Mouse-ISG15-qPCR-F  Mouse-ISG15-qPCR-R  Mouse-MX1-qPCR-F  Mouse-MX1-qPCR-R  Mouse-IFIT1-qPCR-F  Mouse-IFIT1-qPCR-R  Mouse-OAS1b-qPCR-F  Mouse-OAS1b-qPCR-R  Mouse-IL1β-qPCR-F  Mouse-IL1β-qPCR-R  Mouse-IL6-qPCR-F  Mouse-IL6-qPCR-R  Mouse-TNFα-qPCR-F | IDT  IDT  IDT  IDT  IDT  IDT  IDT  IDT  IDT  IDT  IDT  IDT  IDT  IDT  IDT  IDT  IDT  IDT  IDT  IDT  IDT  IDT  IDT  IDT  IDT  IDT  IDT  IDT  IDT  IDT  IDT | TGATAGTACCGGAGGATTGACGAC  CCTTGCAGTGACATGACTGCTCTT  AAGACCAATCCTGTCACCTCTGA  CAAAGCGTCTACGCTGCAGTCC  CGCAGATCACCCAGAAGATCG  TTCGTCGCATTTGTCCACCA  GTTTCCGAAGTGGACATCGCA  CTGCACAGGTTGTTCTCAGC  TTGATGACGATGAAATGCCTGA  CAGGTCACCAGACTCCTCAC  TGTCCAAGGTGGTAAAGGGTG  CCGGCGATTTAACTGATCCTG  CTCTCTCCTTTCAGGGCCAA  GAGAGGCCTGGCTCAACAAA  ACTCACCTCTTCAGAACGAATTG  CCATCTTTGGAAGGTTCAGGTTG  CTCTTCTGCCTGCTGCACTTTG  ATGGGCTACAGGCTTGTCACTC  AGAAGCAGATTGCCCAGAAG  TGCGTCAGAAAGACCTCATAGA  ATGGATTCTGTGAATAATCTGTGCA  CTATGTCTCCAAACTGGGAAGGG  CTGAGATGTCACTTCACATGGAA  GTGCATCCCCAATGGGTTCT  GGGCCTCTAAAGGGGTCAAG  TCAAACTTCACTCCACAACGTC  CCAAAAGATGAAGGGCTGCT  TCATCAGGACAGCCCAGGTC  TTCCATCCAGTTGCCTTCTTG  AATTAAGCCTCCGACTTGTGAA  GGTGCCTATGTCTCAGCCTCTT |
| **Continued** |  |  |
| **REAGENT or RESOURCE** | **SOURCE** | **IDENTIFIER** |
| Mouse-TNFα-qPCR-R | IDT | GCCATAGAACTGATGAGAGGGAG |
| **Recombinant DNA** |  |  |
| PRK-3’HA-STAT1 | Prof. Mingfu Tian(Wuhan U. China) | N/A |
